# Supplementary material for: Pharmacist interventions in osteoporosis management: a systematic review
Source: PubMed Central journal article supplement — Osteoporos Int. 2022 Oct 14;34(2):239–54. doi: 10.1007/s00198-022-06561-1 (PMC9852145; doi:10.1007/s00198-022-06561-1), 2022-10-14
Supplement: 198_2022_6561_MOESM3_ESM.pdf [file 198_2022_6561_MOESM3_ESM.pdf]

**Article title**

Pharmacist interventions in osteoporosis management: a systematic review

**Journal name**

Osteoporosis International

**Author information**

Catherine Laird

ORCID 0000-0002-8550-2901

Corresponding author: [catherine.d.laird@student.uts.edu.au](mailto:catherine.d.laird@student.uts.edu.au)

Graduate School of Health, University of Technology Sydney, PO Box 123, NSW, 2007, Australia.

Helen Benson

ORCID 0000-0002-6918-5045

Kylie A Williams

ORCID 0000-0002-5094-243X

**Online Resource 3** Search strategy

| Search Term                                                                | PubMed                                                                                                                                                                                                                                                                                                                                                                                                                                                                                                                                                                                                                                                                                                                                                                                                                                                                                                                                                                                                                                                                                                                                                                                                                                                                                                                                      | Embase                                          | International<br>Pharmaceutical<br>Abstracts | CINAHL  |
|----------------------------------------------------------------------------|---------------------------------------------------------------------------------------------------------------------------------------------------------------------------------------------------------------------------------------------------------------------------------------------------------------------------------------------------------------------------------------------------------------------------------------------------------------------------------------------------------------------------------------------------------------------------------------------------------------------------------------------------------------------------------------------------------------------------------------------------------------------------------------------------------------------------------------------------------------------------------------------------------------------------------------------------------------------------------------------------------------------------------------------------------------------------------------------------------------------------------------------------------------------------------------------------------------------------------------------------------------------------------------------------------------------------------------------|-------------------------------------------------|----------------------------------------------|---------|
| #1 Osteoporosis                                                            | 99 039                                                                                                                                                                                                                                                                                                                                                                                                                                                                                                                                                                                                                                                                                                                                                                                                                                                                                                                                                                                                                                                                                                                                                                                                                                                                                                                                      | 171 528                                         | 3 546                                        | 30 711  |
| #2 Osteopenia                                                              | 94 468                                                                                                                                                                                                                                                                                                                                                                                                                                                                                                                                                                                                                                                                                                                                                                                                                                                                                                                                                                                                                                                                                                                                                                                                                                                                                                                                      | 26 6655                                         | 156                                          | 3 743   |
| #3 "bone loss"                                                             | 40 485                                                                                                                                                                                                                                                                                                                                                                                                                                                                                                                                                                                                                                                                                                                                                                                                                                                                                                                                                                                                                                                                                                                                                                                                                                                                                                                                      | 46 079                                          | 528                                          | 15 708  |
| #4 "bone density"                                                          | 77 167                                                                                                                                                                                                                                                                                                                                                                                                                                                                                                                                                                                                                                                                                                                                                                                                                                                                                                                                                                                                                                                                                                                                                                                                                                                                                                                                      | 113 086                                         | 641                                          | 24 588  |
| #5 BMD                                                                     | 33 636                                                                                                                                                                                                                                                                                                                                                                                                                                                                                                                                                                                                                                                                                                                                                                                                                                                                                                                                                                                                                                                                                                                                                                                                                                                                                                                                      | 55 643                                          | 547                                          | 7 382   |
| #6 "bone fragility"                                                        | 2 716                                                                                                                                                                                                                                                                                                                                                                                                                                                                                                                                                                                                                                                                                                                                                                                                                                                                                                                                                                                                                                                                                                                                                                                                                                                                                                                                       | 5 715                                           | 30                                           | 730     |
| #7 fracture                                                                | 347 261                                                                                                                                                                                                                                                                                                                                                                                                                                                                                                                                                                                                                                                                                                                                                                                                                                                                                                                                                                                                                                                                                                                                                                                                                                                                                                                                     | 404 195                                         | 2 613                                        | 72 591  |
| #8 OR/1-7                                                                  | 490 772                                                                                                                                                                                                                                                                                                                                                                                                                                                                                                                                                                                                                                                                                                                                                                                                                                                                                                                                                                                                                                                                                                                                                                                                                                                                                                                                     | 585 436                                         | 5 477                                        | 114 676 |
| #9 pharmacist                                                              | 46 465                                                                                                                                                                                                                                                                                                                                                                                                                                                                                                                                                                                                                                                                                                                                                                                                                                                                                                                                                                                                                                                                                                                                                                                                                                                                                                                                      | 99 756                                          | 66 038                                       | 22 995  |
| #10 pharmacy                                                               | 598 751                                                                                                                                                                                                                                                                                                                                                                                                                                                                                                                                                                                                                                                                                                                                                                                                                                                                                                                                                                                                                                                                                                                                                                                                                                                                                                                                     | 147 549                                         | 150 389                                      | 42 217  |
| #11 OR/9-10                                                                | 613 448                                                                                                                                                                                                                                                                                                                                                                                                                                                                                                                                                                                                                                                                                                                                                                                                                                                                                                                                                                                                                                                                                                                                                                                                                                                                                                                                     | 199 182                                         | 161 474                                      | 53 615  |
| #12 8 and 11                                                               | 5 727                                                                                                                                                                                                                                                                                                                                                                                                                                                                                                                                                                                                                                                                                                                                                                                                                                                                                                                                                                                                                                                                                                                                                                                                                                                                                                                                       | 2 275                                           | 1 034                                        | 337     |
| Filters: Human and<br>English<br>Embase:<br>conference extracts<br>removed | 3 538                                                                                                                                                                                                                                                                                                                                                                                                                                                                                                                                                                                                                                                                                                                                                                                                                                                                                                                                                                                                                                                                                                                                                                                                                                                                                                                                       | 1 980<br>(Conference<br>abstracts 804)<br>1 176 | 980                                          | 335     |
| PubMed Search                                                              | <a href="https://pubmed.ncbi.nlm.nih.gov.ezproxy.lib.uts.edu.au/?term=%28%28pharmacy%29+OR+%28pharmacist%29%29+AND+%28%28%28%28%28%28%28%28fracture%29+OR+%28%22bone+fragility%22%29%29+OR+%28bmd%29%29+OR+%28%22bone+density%22%29%29+OR+%28%22bone+loss%22%29%29+OR+%28osteopenia%29%29+OR+%28osteoporosis%29%29&amp;sort=">https://pubmed.ncbi.nlm.nih.gov.ezproxy.lib.uts.edu.au/?term=%28%28pharmacy%29+OR+%28pharmacist%29%29+AND+%28%28%28%28%28%28%28%28fracture%29+OR+%28%22bone+fragility%22%29%29+OR+%28bmd%29%29+OR+%28%22bone+density%22%29%29+OR+%28%22bone+loss%22%29%29+OR+%28osteopenia%29%29+OR+%28osteoporosis%29%29&amp;sort=</a><br><br>Search: ((pharmacy) OR (pharmacist)) AND (((((((fracture) OR ("bone fragility")) OR (bmd)) OR ("bone density")) OR ("bone loss")) OR (osteopenia)) OR (osteoporosis))<br><br>("pharmacie"[All Fields] OR "pharmacies"[MeSH Terms] OR "pharmacies"[All Fields] OR "pharmacy"[MeSH Terms] OR "pharmacy"[All Fields] OR "pharmacy s"[All Fields] OR ("pharmacist s"[All Fields] OR "pharmacists"[MeSH Terms] OR "pharmacists"[All Fields] OR "pharmacist"[All Fields])) AND ("fractur"[All Fields] OR "fractural"[All Fields] OR "fracture s"[All Fields] OR "fractures, bone"[MeSH Terms] OR ("fractures"[All Fields] AND "bone"[All Fields]) OR "bone fractures"[All Fields] OR |                                                 |                                              |         |

|                                        |                                                                                                                                                                                                                                                                                                                                                                                                                                                                                                                                                                                                                                                                                                                                                                                                                                                                                                                                                                                                                                                                                                                                                                                                                                                                                                                                                                                                                                                                                                                                                                                                                                                                                                                                                                                                                                                                                                                                                          |
|----------------------------------------|----------------------------------------------------------------------------------------------------------------------------------------------------------------------------------------------------------------------------------------------------------------------------------------------------------------------------------------------------------------------------------------------------------------------------------------------------------------------------------------------------------------------------------------------------------------------------------------------------------------------------------------------------------------------------------------------------------------------------------------------------------------------------------------------------------------------------------------------------------------------------------------------------------------------------------------------------------------------------------------------------------------------------------------------------------------------------------------------------------------------------------------------------------------------------------------------------------------------------------------------------------------------------------------------------------------------------------------------------------------------------------------------------------------------------------------------------------------------------------------------------------------------------------------------------------------------------------------------------------------------------------------------------------------------------------------------------------------------------------------------------------------------------------------------------------------------------------------------------------------------------------------------------------------------------------------------------------|
|                                        | <p>"fracture"[All Fields] OR "fractured"[All Fields] OR "fractures"[All Fields] OR "fracturing"[All Fields] OR "bone fragility"[All Fields] OR "bmd"[All Fields] OR "bone density"[All Fields] OR "bone loss"[All Fields] OR ("bone diseases, metabolic"[MeSH Terms] OR ("bone"[All Fields] AND "diseases"[All Fields] AND "metabolic"[All Fields]) OR "metabolic bone diseases"[All Fields] OR "osteopenia"[All Fields] OR "osteopenias"[All Fields]) OR ("osteoporosis"[MeSH Terms] OR "osteoporosis"[All Fields] OR "osteoporoses"[All Fields] OR "osteoporosis, postmenopausal"[MeSH Terms] OR ("osteoporosis"[All Fields] AND "postmenopausal"[All Fields]) OR "postmenopausal osteoporosis"[All Fields]))</p> <p><b>Translations</b></p> <p><b>pharmacy:</b> "pharmacie"[All Fields] OR "pharmacies"[MeSH Terms] OR "pharmacies"[All Fields] OR "pharmacy"[MeSH Terms] OR "pharmacy"[All Fields] OR "pharmacy's"[All Fields]</p> <p><b>pharmacist:</b> "pharmacist's"[All Fields] OR "pharmacists"[MeSH Terms] OR "pharmacists"[All Fields] OR "pharmacist"[All Fields]</p> <p><b>fracture:</b> "fractur"[All Fields] OR "fractural"[All Fields] OR "fracture's"[All Fields] OR "fractures, bone"[MeSH Terms] OR ("fractures"[All Fields] AND "bone"[All Fields]) OR "bone fractures"[All Fields] OR "fracture"[All Fields] OR "fractured"[All Fields] OR "fractures"[All Fields] OR "fracturing"[All Fields]</p> <p><b>osteopenia:</b> "bone diseases, metabolic"[MeSH Terms] OR ("bone"[All Fields] AND "diseases"[All Fields] AND "metabolic"[All Fields]) OR "metabolic bone diseases"[All Fields] OR "osteopenia"[All Fields] OR "osteopenias"[All Fields]</p> <p><b>osteoporosis:</b> "osteoporosis"[MeSH Terms] OR "osteoporosis"[All Fields] OR "osteoporoses"[All Fields] OR "osteoporosis, postmenopausal"[MeSH Terms] OR ("osteoporosis"[All Fields] AND "postmenopausal"[All Fields]) OR "postmenopausal osteoporosis"[All Fields]</p> |
| Embase Search                          | <p><a href="https://ezproxy.lib.uts.edu.au/login?url=http://ovidsp.ovid.com/ovidweb.cgi?T=JS&amp;NEWS=N&amp;PAGE=main&amp;SHAREDSEARCHID=6nY16F0G2F4QJMPgVaychiozsR0h8LTqihpwyY13XKXxatvkHWw2ZSvMcEKzV0xyg">https://ezproxy.lib.uts.edu.au/login?url=http://ovidsp.ovid.com/ovidweb.cgi?T=JS&amp;NEWS=N&amp;PAGE=main&amp;SHAREDSEARCHID=6nY16F0G2F4QJMPgVaychiozsR0h8LTqihpwyY13XKXxatvkHWw2ZSvMcEKzV0xyg</a></p> <ol style="list-style-type: none"> <li>1. osteoporosis/ or osteoporosis.mp.</li> <li>2. osteopenia/ or osteopenia.mp.</li> <li>3. "bone loss".mp.</li> <li>4. "bone density".mp. or bone density/</li> <li>5. BMD.mp.</li> <li>6. "bone fragility".mp. or bone fragility/</li> <li>7. fracture.mp. or fracture/</li> <li>8. 1 or 2 or 3 or 4 or 5 or 6 or 7</li> <li>9. pharmacist.mp. or exp pharmacist/</li> <li>10. pharmacy.mp. or "pharmacy (shop)"/</li> <li>11. 9 or 10</li> <li>12. 8 and 11</li> </ol>                                                                                                                                                                                                                                                                                                                                                                                                                                                                                                                                                                                                                                                                                                                                                                                                                                                                                                                                                                                                                       |
| International Pharmaceutical Abstracts | <p><a href="http://ezproxy.lib.uts.edu.au/login?url=https://www.proquest.com/search/2035452?accountid=17095">http://ezproxy.lib.uts.edu.au/login?url=https://www.proquest.com/search/2035452?accountid=17095</a></p> <p>(osteoporosis OR osteopenia OR "bone loss" OR "bone density" OR BMD OR "bone fragility" OR fracture) AND (pharmacist OR pharmacy)</p>                                                                                                                                                                                                                                                                                                                                                                                                                                                                                                                                                                                                                                                                                                                                                                                                                                                                                                                                                                                                                                                                                                                                                                                                                                                                                                                                                                                                                                                                                                                                                                                            |
| CINAHL                                 | <p><a href="https://search.ebscohost.com/login.aspx?direct=true&amp;db=cin20&amp;bquery=((MH+%26quot%20%3bOsteoporosis%26quot%20%3b)+OR+%26quot%20%3bosteoporosis%26quot%20%3b)+OR+(%26quot%20%3bosteopenia%26quot%20%3b)+OR+(MH+%26quot%20%3bBone+Diseases%2c+Metabolic%26quot%20%3b)+OR+(MH+%26quot%20%3bBone+Resorption%26quot%20%3b)+OR+%26quot%20%3b%26quot%20%3bbone+loss%26quot%20%3b%26quot%20%3b)+OR+(MH+%26quot%20%3bBone+Density%26quot%20%3b)+OR+%26quot%20%3b%26quot%20%3bbone+density%26quot%20%3b%26quot%20%3b)+OR+%26quot%20%3bBMD%26quot%20%3b)+OR+(%26quot%20%3b%26quot%20%3bbone+fragility%26quot%20%3b%26quot%20%3b)+OR+(%26quot%20%3bfracture%26quot%20%3b)+OR+(MH+%26quot%20%3bFractures%26quot%20%3b))+AND+((MH+%26quot%20%3bPharmacists%26quot%20%3b)+OR+%26quot%20%3bpharmacist%26quot%20%3b)+OR+(MH+%26quot%20%3bPharmacy+Service">https://search.ebscohost.com/login.aspx?direct=true&amp;db=cin20&amp;bquery=((MH+%26quot%20%3bOsteoporosis%26quot%20%3b)+OR+%26quot%20%3bosteoporosis%26quot%20%3b)+OR+(%26quot%20%3bosteopenia%26quot%20%3b)+OR+(MH+%26quot%20%3bBone+Diseases%2c+Metabolic%26quot%20%3b)+OR+(MH+%26quot%20%3bBone+Resorption%26quot%20%3b)+OR+%26quot%20%3b%26quot%20%3bbone+loss%26quot%20%3b%26quot%20%3b)+OR+(MH+%26quot%20%3bBone+Density%26quot%20%3b)+OR+%26quot%20%3b%26quot%20%3bbone+density%26quot%20%3b%26quot%20%3b)+OR+%26quot%20%3bBMD%26quot%20%3b)+OR+(%26quot%20%3b%26quot%20%3bbone+fragility%26quot%20%3b%26quot%20%3b)+OR+(%26quot%20%3bfracture%26quot%20%3b)+OR+(MH+%26quot%20%3bFractures%26quot%20%3b))+AND+((MH+%26quot%20%3bPharmacists%26quot%20%3b)+OR+%26quot%20%3bpharmacist%26quot%20%3b)+OR+(MH+%26quot%20%3bPharmacy+Service</a></p>                                                                                                                                                                                                                                     |

[%26quot%3b\)+OR+\(MH+%26quot%3bPharmacy%2c+Retail%26quot%3b\)+OR+%26quot%3bpharmacy%26quot%3b\)\)&type=1&searchMode=Standard&site=ehost-live](#)

Search Options:

Expanders- Apply equivalent subjects

Search modes- Boolean/Phrase

1. (MR "Osteoporosis") OR "osteoporosis"
2. "osteopenia OR (MH "Bone Diseases, Metabolic")
3. ("Bone Resorption") or "bone loss"
4. (MH "Bone Density") OR "bone density"
5. "BMD"
6. "bone fragility"
7. "fracture" OR (MH "Fractures")
8. 1 OR 2 OR 3 OR 5 OR 5 OR 6 OR 7
9. (MH "Pharmacists") OR "pharmacist"
10. (MH "Pharmacy Service" or (MH "Pharmacy, Retail") or "pharmacy
11. 9 OR 10
12. 8 AND 11
