# Supplementary material for: Pharmacist interventions in osteoporosis management: a systematic review
Source: PubMed Central journal article supplement — Osteoporos Int. 2022 Oct 14;34(2):239–54. doi: 10.1007/s00198-022-06561-1 (PMC9852145; doi:10.1007/s00198-022-06561-1), 2022-10-14
Supplement: 198_2022_6561_MOESM4_ESM.pdf [file 198_2022_6561_MOESM4_ESM.pdf]

**Article title**

Pharmacist interventions in osteoporosis management: a systematic review

**Journal name**

Osteoporosis International

**Author information**

Catherine Laird

ORCID 0000-0002-8550-2901

Corresponding author: [catherine.d.laird@student.uts.edu.au](mailto:catherine.d.laird@student.uts.edu.au)

Graduate School of Health, University of Technology Sydney, PO Box 123, NSW, 2007, Australia.

Helen Benson

ORCID 0000-0002-6918-5045

Kylie A Williams

ORCID 0000-0002-5094-243X

**Online Resource 4** Studies excluded following full-text screening

| Title                                                                                                                               | Authors                                                                                                                                                                                          | Year | Journal                                  | Volume | Issue | Pages     | DOI                          | Exclusion reason |
|-------------------------------------------------------------------------------------------------------------------------------------|--------------------------------------------------------------------------------------------------------------------------------------------------------------------------------------------------|------|------------------------------------------|--------|-------|-----------|------------------------------|------------------|
| Osteoporosis in long-term care residents with multiple sclerosis                                                                    | Ryan-Haddad, Ann M.;<br>Lenz, Thomas L.;<br>Degner, Kayleen;<br>Faulkner, Michele A.                                                                                                             | 2005 | Consultant Pharmacist                    | 20     | 2     | 128-136   | 10.4140/TCP.n.2005.128       | Study type       |
| Two-year persistence with teriparatide improved significantly after introduction of an educational and motivational support program | van Maren, M. A.;<br>Wyers, C. E.; Driessen,<br>J. H. M.; Visser, J. V.; de<br>Vries, F.; van de<br>Wijdeven, K.; Gevers,<br>S.; Lems, W. F.;<br>Emmelot-Vonk, M. H.;<br>van den Bergh, J. P. W. | 2019 | Osteoporosis<br>International            | 30     | 9     | 1837-1844 | 10.1007/s00198-019-05052-0   | Study type       |
| Building for better bones: evaluation of a clinical pathway in the secondary prevention of osteoporotic fractures                   | Sofie, Saey; Yves, Piette;<br>Barbara, Verstraete;<br>Margareta, Lambert;<br>Raf, Van Hoeyweghen;<br>Bruno, Vandekerckhove;<br>Marc, Haspeslagh;<br>Veerle, Grootaert                            | 2018 | European Journal of<br>Hospital Pharmacy | 25     | 4     | 210-213   | 10.1136/ejhpharm-2016-000906 | Study type       |

|                                                                                                                                                                                                            |                                                                                                                                                                                                                    |      |                                                 |    |   |                       |                            |            |
|------------------------------------------------------------------------------------------------------------------------------------------------------------------------------------------------------------|--------------------------------------------------------------------------------------------------------------------------------------------------------------------------------------------------------------------|------|-------------------------------------------------|----|---|-----------------------|----------------------------|------------|
| Ability of community pharmacists to promote self-care and self-medication by local residents [I]: Improvements in bone mineral density                                                                     | Wada, Y.; Ennyu, S.; Shimokawa, K. I.; Ishii, F.                                                                                                                                                                   | 2017 | Drug Discoveries & Therapeutics                 | 11 | 1 | 35-40                 | 10.5582/ddt.2016.01075     | Study type |
| Impact of Pharmacist-Physician Collaboration on Osteoporosis Treatment Rates                                                                                                                               | Bowers, B. L.; Drew, A. M.; Verry, C.                                                                                                                                                                              | 2018 | Annals of Pharmacotherapy                       | 52 | 9 | 876-883               | 10.1177/1060028018770622   | Study type |
| A pharmacist-run anabolic osteoporosis clinic: An abaloparatide descriptive report                                                                                                                         | McGreevy, J. L.; Kane, M. P.; Busch, R. S.; Bakst, G.; ElDeiry, S.                                                                                                                                                 | 2019 | Journal of the American Pharmacists Association | 59 |   | 593-597               | 10.1016/j.japh.2019.03.017 | Study type |
| Challenges to prevent secondary fractures in patients with hip fractures in Joetsu Myoko, Japan through the increased use of osteoporosis treatment and collaboration with family doctors                  | Suzuki, N.; Arai, K.; Kon, S.; Yamanaka, K.; Otsuka, H.; Koizumi, M.; Hosaka, N.; Tsuchiya, M.; Mochizuki, T.; Kuraishi, T.; Murayama, T.; Tashi, H.; Oike, N.; Wakasugi, M.; Takahashi, Y.; Nakadai, M.; Endo, N. | 2017 | Journal of Bone Mineral Metabolism              | 35 | 3 | 315-323               | 10.1007/s00774-016-0758-7  | Study type |
| Education and exercise program improves osteoporosis knowledge and changes calcium and vitamin D dietary intake in community dwelling elderly                                                              | Park, K. S.; Yoo, J. I.; Kim, H. Y.; Jang, S.; Park, Y.; Ha, Y. C.                                                                                                                                                 | 2017 | BMC Public Health                               | 17 | 1 | 966                   | 10.1186/s12889-017-4966-4  | Study type |
| Magnitude of applicability of clinical practice guidelines for diagnosis, prevention and treatment of osteoporosis in pharmacy practice                                                                    | Khaliq, Sheikh A.; Naqvi, Syed B. S.; Fatima, Bilqees; Fatima, Anab                                                                                                                                                | 2017 | Latin American Journal of Pharmacy              | 36 | 7 | 1322-1327             |                            | Study type |
| Osteoporosis screening and risk-reduction services provided in community pharmacies                                                                                                                        | Issets, B.J; Bond, W.                                                                                                                                                                                              | 1997 | Minesota Pharmacist                             | 51 | 6 | 7-8, 18, 22-23, 26-29 |                            | Study type |
| Strategies to overcome barriers to implementing osteoporosis and fracture prevention guidelines in long-term care: a qualitative analysis of action plans suggested by front line staff in Ontario, Canada | Alamri, S. H.; Kennedy, C. C.; Marr, S.; Lohfeld, L.; Skidmore, C. J.; Papaioannou, A.                                                                                                                             | 2015 | BMC Geriatrics                                  | 15 |   | 94                    | 10.1186/s12877-015-0099-8  | Study type |
| Osteoporosis prescribing in long-term care: impact of a provincial knowledge translation strategy                                                                                                          | Kennedy, Courtney C.; Ioannidis, George; Thabane, Lehana; Adachi, Jonathan D.; O'Donnell, Denis; Giangregorio, Lora M.; Pickard, Laura E.; Papaioannou, Alexandra                                                  | 2015 | Canadian journal on aging                       | 34 | 2 | 137-148               | 10.1017/S0714980815000057  | Study type |

|                                                                                                                              |                                                                                                                                                                                |      |                                                      |    |                   |           |                             |            |
|------------------------------------------------------------------------------------------------------------------------------|--------------------------------------------------------------------------------------------------------------------------------------------------------------------------------|------|------------------------------------------------------|----|-------------------|-----------|-----------------------------|------------|
| Development of a risk assessment and prevention strategy for osteoporosis                                                    | Lawrence, S.; Taylor, S. J.                                                                                                                                                    | 2002 | Australian Journal of Pharmacy                       | 83 |                   | 904-907   |                             | Study type |
| Pharmacist collaboration in a specialist adult falls and syncope clinic - orthostatic hypotension                            | Holden, K.; Pearson, L.; Prescott, R.                                                                                                                                          | 2007 | ASHP Midyear Clinical Meeting                        | 42 | Dec               |           |                             | Study type |
| Pharmacist screening for risk of osteoporosis in elderly veterans                                                            | Salvig, Brent E.; Gulum, Alev H.; Walters, Stephanie A.; Edwards, Leigh B.; Fourakre, T. Neal; McKenzie, Michael S.; Marvin, Susan C.; Moseley, Michelle V.; Ansari, Ishrat J. | 2016 | Consultant Pharmacist                                | 31 | 8                 | 440-449   | 10.4140/TCP.n.2016.440      | Study type |
| Potentially inappropriate prescribing in nursing home residents detected with the community pharmacist specific GheOP3S-tool | Tommelein, Eline; Mehuys, Els; Van Damme, Charlotte; Pattyn, Eva; Mattelin, Kristof; Boussery, Koen; Petrovic, Mirko; Somers, Annemie                                          | 2016 | International Journal of Clinical Pharmacy           | 38 | 5                 | 1063-1068 | 10.1007/s11096-016-0366-6   | Study type |
| Assessing the impact of osteoporosis screening                                                                               | Elliott, M. E.                                                                                                                                                                 | 2005 | The Journal of the Pharmacy Society of Wisconsin     |    | November/December | 41-45     |                             | Study type |
| Refinement of an osteoporosis risk-assessment questionnaire for use in community pharmacy                                    | Poh, L. S.; Taylor, S.; McAteer, S.                                                                                                                                            | 2008 | International Journal of Pharmacy Practice           | 16 |                   | 279-286   |                             | Study type |
| Exploring the current and future role of the pharmacists in osteoporosis screening and management in Malaysia                | Toh, L. S.; Lai, P. S. M.; Othman, S.; Shah, A.; Dang, C. P. L.; Low, B. Y.; Wong, K. T.; Anderson, C.                                                                         | 2018 | International Journal of Clinical Pharmacy           | 40 | 2                 | 450-457   | 10.1007/s11096-018-0597-9   | Study type |
| Awareness of osteoporosis risk assessment tools and screening recommendations among community pharmacists in Malaysia        | Francis, J.; Toh, L. S.; Sellappans, R.; Loo, J. S. E.                                                                                                                         | 2021 | International Journal of Clinical Pharmacy           | 43 | 3                 | 604-612   | 10.1007/s11096-020-01169-z  | Study type |
| Comparative performance of annual wellness visits between pharmacists and physicians at primary care clinics                 | Wargo, Ryan; Johnson, Christa; Moffatt, Evelyn; Kisakye, Suzuki, Marina                                                                                                        | 2021 | Journal of the American College of Clinical Pharmacy | 4  |                   | 1524-1533 | 10.1002/jac5.1544           | Study type |
| Medication reconciliation of patients with hip fracture by clinical pharmacists                                              | Gjerde, Anne Marie; Aa, Elizabeth; Sund, Janne; Kutschera; Stenumgard, Pal; Johnsen, Lars; Gunnar                                                                              | 2016 | European Journal of Hospital Pharmacy                | 23 | 3                 | 166-170   | 10.1136/ejpharm-2015-000741 | Study type |

|                                                                                                                                                                                 |                                                                                                                                                                                                                                          |      |                                                    |     |    |           |                              |            |
|---------------------------------------------------------------------------------------------------------------------------------------------------------------------------------|------------------------------------------------------------------------------------------------------------------------------------------------------------------------------------------------------------------------------------------|------|----------------------------------------------------|-----|----|-----------|------------------------------|------------|
| Identify population attitude towards osteoporosis and pharmacists involvement in community education in Makkah, Saudi Arabia: A cross-sectional study                           | Fairaq, Arwa; Sulimani, Byader; Alahmadi, Ghada; Hijji, Nouf Adnan; Alessa, Rahma; Alharthi, Sara; Alhindi, Yosra                                                                                                                        | 2021 | Indian Journal of Forensic Medicine and Toxicology | 15  | 1  | 857-863   | 10.37506/ijfmt.v15i1.13524   | Study type |
| Evaluation of care delivery by a novel multidisciplinary bone health clinic for patients at risk of glucocorticoid-induced osteoporosis                                         | Abdullah, H.; Koller, G.; Zuna, I.; Yuksel, N.; Charrois, T.; Mandhane, R.; Cotton, K.; Danilak, M.; Bell, H.; Ye, C.                                                                                                                    | 2021 | Archives of Osteoporosis                           | 16  | 1  | 108       | 10.1007/s11657-021-00979-6   | Study type |
| Osteoporosis Amongst Jordanians: Effect of Pharmacist-Directed Brochure Education on People's Knowledge                                                                         | Elayeh, E.; Akour, A.; Yousef, A. M.; Farah, D.; Basheti, I.                                                                                                                                                                             | 2014 | Tropical Journal of Pharmaceutical Research        | 13  | 12 | 2101-2108 | 10.4314/tjpr.v13i12.22       | Study type |
| Interprofessional care for patients with osteoporosis in a continuing care retirement community                                                                                 | Masterson, J.; Woodall, T.; Wilson, C. G.; Ray, L.; Scott, M. A.                                                                                                                                                                         | 2016 | Journal of the American Pharmacists Association    | 56  |    | 184-188   | 10.1016/j.aph.2016.01.004    | Study type |
| Labor costs and economic impact of a primary care clinical pharmacy service on postfracture care in postmenopausal women                                                        | Irwin, Adriane N.; Billups, Sarah J.; Heilmann, Rachel M. F.                                                                                                                                                                             | 2015 | Pharmacotherapy                                    | 35  | 3  | 243-250   | 10.1002/phar.1554            | Study type |
| Point-of-care screenings at the University of Minnesota: Mechanism for civic engagement                                                                                         | Palombi, L. C.; Bastianelli, K.; Stratton, T.                                                                                                                                                                                            | 2014 | Journal of the American Pharmacists Association    | 54  | 1  | 56-62     | 10.1331/JAPhA.2014.13122     | Study type |
| Pharmacist's role in an interdisciplinary falls clinic                                                                                                                          | Flores, Emily K.; Henry, Robin; Stewart, David W.                                                                                                                                                                                        | 2011 | Southern Medical Journal                           | 104 | 2  | 143-146   | 10.1097/SMJ.0b013e318200c1ec | Study type |
| Developing a model Fracture Liaison Service consultation with patients, carers and clinicians: a Delphi survey to inform content of the iFraP complex consultation intervention | Bullock, L.; Crawford-Manning, F.; Cottrell, E.; Fleming, J.; Leyland, S.; Edwards, J.; Clark, E. M.; Thomas, S.; Chapman, S.; Gidlow, C.; Iglesias, C. P.; Protheroe, J.; Horne, R.; O'Neill, T. W.; Mallen, C.; Jinks, C.; Paskins, Z. | 2021 | Archives of Osteoporosis                           | 16  | 1  | 58        | 10.1007/s11657-021-00913-w   | Study type |
| Closing the osteoporotic-fracture care gap for frail older persons                                                                                                              | Pillay, Isweri; Hussain, F.; O'Reilly, A.; Sayers, K.; Maher, J.; Ryan, S.                                                                                                                                                               | 2021 | Irish Medical Journal                              | 114 | 8  | P434      |                              | Study type |

|                                                                                                                                                       |                                                                                                                                                                                                                                  |      |                                                 |     |    |           |                            |            |
|-------------------------------------------------------------------------------------------------------------------------------------------------------|----------------------------------------------------------------------------------------------------------------------------------------------------------------------------------------------------------------------------------|------|-------------------------------------------------|-----|----|-----------|----------------------------|------------|
| Implementation of a pharmacist and student pharmacist-led primary care service to identify and treat rural veterans at risk for osteoporotic fracture | Wopat, Maria; Breslow, Robert; Chesney, Kiera; McCauley, Mackenzie; Van Gysel, Reid; Gray, Andrea; Hilsenhoff, Jordan; Edwardson, Graham; Nachreiner, Joshua; Hoff, Lindsey; Gruber, Stephanie; Shattuck, Paul; Portillo, Edward | 2021 | Journal of the American Pharmacists Association | 61  |    | e105-e112 | 10.1016/j.japh.2021.07.011 | Study type |
| Effect of patient-led cooperative follow-up by general practitioners and community pharmacists on osteoporosis treatment persistence                  | Poivret, Didier; Goetz, Christophe; Zevering, Yinka; Wilcke, Christophe; Noirez, Veronique                                                                                                                                       | 2021 | International Journal of Rheumatic Diseases     | 24  | 7  | 912-921   | 10.1111/1756-185X.14146    | Study type |
| Patient Healthcare Trajectory and its Impact on the Cost-Effectiveness of Fracture Liaison Services                                                   | Senay, A.; Fernandes, J. C.; Delisle, J.; Morin, S. N.; Dragomir, A.; Nazha, S.; Perreault, S.                                                                                                                                   | 2021 | Journal of Bone and Mineral Research            | 36  | 3  | 459-468   | 10.1002/jbmr.4216          | Study type |
| Successful implementation of a Fracture Liaison Service through effective change management: a qualitative study                                      | Wozniak, L. A.; Beaupre, L. A.; Juby, A.; Kivi, P.; Majumdar, S. R.; Hanson, H. M.                                                                                                                                               | 2020 | Archives of Osteoporos                          | 15  | 1  | 44        | 10.1007/s11657-020-0692-0  | Study type |
| Feasibility of an interprofessional collaborative osteoporosis screening programme in Malaysia                                                        | Toh, L. S.; Lai, P. S. M.; Low, B. Y.; Wong, K. T.; Anderson, C.                                                                                                                                                                 | 2020 | International Journal of Clinical Pharmacy      | 42  | 1  | 11-17     | 10.1007/s11096-019-00960-x | Study type |
| Performance of a Fracture Liaison Service in an Orthopaedic Setting: A Report of Key Indicators and Improvement of Longitudinal Outcomes              | Senay, A.; Perreault, S.; Delisle, J.; Morin, S. N.; Fernandes, J. C.                                                                                                                                                            | 2020 | Journal of Bone and Joint Surgery               | 102 | 6  | 486-494   | 10.2106/jbjs.19.00185      | Study type |
| Community based screening and intervention to optimize preventive care of osteoporosis                                                                | Baseer, Amatul; Raqeebuddin, M. A.; Salman, Syed; Badri, V.; Lankeswar Rao, K.                                                                                                                                                   | 2020 | Journal of Pharmaceutical Sciences and Research | 12  | 11 | 1437-1447 |                            | Study type |
| Persistence and compliance to osteoporosis therapy in a fracture liaison service: a prospective cohort study                                          | Senay, A.; Fernandes, J. C.; Delisle, J.; Morin, S. N.; Perreault, S.                                                                                                                                                            | 2019 | Archives of Osteoporos                          | 14  | 1  | 87        | 10.1007/s11657-019-0633-y  | Study type |
| Evaluation of the need for a fracture liaison service in a patient-centered medical home                                                              | Crissman, J. K.; Woodall, T.; LaVallee, L.; Masterson, J.; Scott, M. A.                                                                                                                                                          | 2019 | Journal of the American Pharmacists Association | 59  |    | 565-569   | 10.1016/j.japh.2019.02.010 | Study type |

|                                                                                                                                                                         |                                                                                                       |      |                                            |    |             |           |                             |            |
|-------------------------------------------------------------------------------------------------------------------------------------------------------------------------|-------------------------------------------------------------------------------------------------------|------|--------------------------------------------|----|-------------|-----------|-----------------------------|------------|
| Bone health assessments by student pharmacists during interprofessional education                                                                                       | Fava, Joseph P.; Whitney, Mary; O'Connell, Mary Beth; Mendez, Jennifer                                | 2020 | Currents in Pharmacy Teaching and Learning | 12 | 9           | 1101-1109 | 10.1016/j.cptl.2020.04.019  | Study type |
| The role of community pharmacists in the prevention and management of osteoporosis and the risk of falls: Results of a cross-sectional study and qualitative interviews | Laliberte, M. C.; Perreault, S.; Damestoy, N.; Lalonde, L.                                            | 2013 | Osteoporosis International                 | 24 | 6           | 1803-1815 | 10.1007/s00198-012-2171-y   | Study type |
| Proactive pharmaceutical care interventions decrease patients' nonadherence to osteoporosis medication                                                                  | Stuurman-Bieze, A. G. G.; Van Boven, J. F. M.; Vegter, S.; Hiddink, E. G.                             | 2014 | Osteoporosis International                 | 25 | 6           | 1807-1812 | 10.1007/s00198-014-2659-8   | Study type |
| Treatment and Management of Postmenopausal Osteoporosis Within an Ambulatory Care Network                                                                               | Romanelli, R.J.; Leahy, A.; Jukes, T.; Ishisaka, D.Y.                                                 | 2013 | Journal of Pharmacy Technology             | 29 | March/April | 55-60     |                             | Study type |
| Bridging the osteoporosis treatment gap: performance and cost-effectiveness of a fracture liaison service                                                               | Yates, C. J.; Chauchard, M. A.; Liew, D.; Bucknill, A.; Wark, J. D.                                   | 2015 | Journal of clinical densitometry           | 18 | 2           | 150-6     | 10.1016/j.jocd.2015.01.003  | Study type |
| Use of medicines that influence falls or fractures in a residential home setting                                                                                        | Wilcock, M.; MacMahon, D.; Woolf, A.                                                                  | 2005 | Pharmacy World & Science                   | 27 |             | 220-222   |                             | Study type |
| Impact of community pharmacy-based osteoporosis education program on diagnosis and risk assesment for development of fractures: A model study                           | Sahin, Nefise Ozlen; Oz, Ozen; Sert, Hakan; Buyukservi, Benin                                         | 2005 | Pharmacia                                  | 52 | 1-Feb       | 170-173   |                             | Study type |
| Use of the FRAX screening tool to assess fracture risk in a long-term care facility                                                                                     | Hanson, Laura                                                                                         | 2013 | Consultant Pharmacist                      | 28 | 7           | 426-431   | 10.4140/TCP.n.2013.426      | Study type |
| Impact of pharmacist-led community bone mineral density screenings                                                                                                      | Summers, K. M.; Brock, T. P.                                                                          | 2005 | The Annals of Pharmacotherapy              | 39 |             | 243-248   | 10.1345/aph.1E321           | Study type |
| Medication monitoring and optimization: A targeted pharmacist program for effective and cost-effective improvement of chronic therapy adherence                         | van Boven, Job F. M.; Postma, Maarten J.; Vegter, Stefan; Hiddink, Eric G.; Stuurman-Bieze, Ada G. G. | 2014 | Journal of Managed Care Pharmacy           | 20 | 8           | 786-792   | 10.18553/jmcp.2014.20.8.786 | Study type |
| Improving Osteoporosis Management in General Practice: A Pharmacist-Led Drug Use Evaluation Program                                                                     | Tan, Edwin C. K.; George, Johnson; Stewart, Kay; Elliott, Rohan A.                                    | 2014 | Drugs & Aging                              | 31 |             | 703-709   | 10.1007/s40266-014-0194-0   | Study type |

|                                                                                                                                                              |                                                                                                                                                                      |      |                                                        |     |     |         |                                  |            |
|--------------------------------------------------------------------------------------------------------------------------------------------------------------|----------------------------------------------------------------------------------------------------------------------------------------------------------------------|------|--------------------------------------------------------|-----|-----|---------|----------------------------------|------------|
| Health care Passport: A population-based introductory pharmacy practice model for Medicare beneficiaries                                                     | Carr-Lopez, Sian M.; Woelfel, Joseph A.; Patel, Rajul A.; Galal, Suzanne M.; Shioji, Michael; Nicolas, Marlyn; Hoang, Dina; Rodriguez, Jennifer; Rahan, Neha         | 2014 | Currents in Pharmacy Teaching and Learning             | 6   | 6   | 891-899 | 10.1016/j.cptl.2014.08.003       | Study type |
| PRO-OSTEO Extend I study (improving osteoporosis management in the acute and rehabilitation settings): multicentre audit                                     | Banakh, I.; Chao, S.                                                                                                                                                 | 2015 | Pharmacy Practice and Research                         | 45  |     | 38-45   |                                  | Study type |
| Impact of pharmacist intervention on osteoporosis treatment after fragility fracture: Positive effect of pharmacist information program shown in pilot study | Martin, Janet; Wazny, Lori D.; Riley, Karen                                                                                                                          | 2005 | Canadian Pharmaceutical Journal                        | 138 | 1   | 37-43   |                                  | Study type |
| Pharmacist-provided quantitative ultrasound screening for rural women at risk of osteoporosis                                                                | Naunton, Mark; Peterson, Gregory M.; Jones, Graeme                                                                                                                   | 2006 | Annals of Pharmacotherapy                              | 40  | 1   | 38-44   | 10.1345/aph.1G208                | Study type |
| Acceptability of pharmacy-based bone density measurement by women and primary healthcare providers                                                           | Lata, P. F.; Binkley, N. C.; Elliott, M. E.; Lata, Paul F.; Binkley, Neil C.; Elliott, Mary E.                                                                       | 2002 | Menopause                                              | 9   | 6   | 449-455 | 10.1097/00042192-200211000-00011 | Study type |
| Utilization of a pharmacist consultant to increase patient persistency                                                                                       | Ringer, J.; Diamond, L.; Long, K. A.; Ross, R.; Fenton, F.                                                                                                           | 1999 | Michigan Pharmacist                                    | 37  | Feb | 22-25   |                                  | Study type |
| Pharmacist-provided quantitative heel ultrasound screening for rural women at risk of osteoporosis                                                           | Naunton, M.; Peterson, G. M.; Jones, G.; Naunton, Mark; Peterson, Gregory M.; Jones, Graeme                                                                          | 2006 | Annals of Pharmacotherapy                              | 40  | 1   | 38-44   | 10.1345/aph.1G208                | Study type |
| Bone health screening, education, and referral project in northwest Iowa: creating a model for community pharmacies                                          | Johnson, J. F.; Koenigsfeld, C.; Hughell, L.; Parsa, R. A.; Bravard, S.; Johnson, June Felice; Koenigsfeld, Carrie; Hughell, Laurie; Parsa, Rahul A.; Bravard, Susan | 2008 | Journal of the American Pharmacists Association: JAPhA | 48  | 3   | 379-387 | 10.1331/JAPhA.2008.07026         | Study type |
| Osteoporosis risk screening for women in a community pharmacy                                                                                                | Liu, Y. F.; Nevins, J. C.; Carruthers, K. M.; Doucette, W. R.; Pan, X. Y.                                                                                            | 2007 | Journal of the American Pharmacists Association        | 47  | 4   | 521-526 |                                  | Study type |
| A quality improvement study on calcium and vitamin D supplementation in long-term care                                                                       | Munir, J.; Wright, R. J.; Carr, D. B.                                                                                                                                | 2006 | Journal of the American Medical Directors Association  | 7   | 5   | 305-309 | 10.1016/j.jamda.2005.11.006      | Study type |

|                                                                                                                                                                 |                                                                                               |      |                                                       |    |    |           |                                  |            |
|-----------------------------------------------------------------------------------------------------------------------------------------------------------------|-----------------------------------------------------------------------------------------------|------|-------------------------------------------------------|----|----|-----------|----------------------------------|------------|
| Clinical pharmacists' role in improving osteoporosis treatment rates among elderly patients with untreated atraumatic fractures                                 | Plushner, Susyn Lynn; Delate, Thomas; Nadrash, T. Ann                                         | 2008 | Annals of Pharmacotherapy                             | 42 | 3  | 334-340   | 10.1345/aph.1K541                | Study type |
| Osteoporosis screening in an outpatient liver transplant clinic: impact of primary immunosuppression                                                            | Smallwood, G. A.; Wickman, J. M.; Martinez, E.; Stieber, A. C.; Heffron, T. G.                | 2002 | Transplant Proceedings                                | 34 | 5  | 1569-70   | 10.1016/s0041-1345(02)03026-9    | Study type |
| Osteoporosis screening: Is screening effective? Can it be done economically? Will people pay for it?                                                            | Farina, R. D.; Corbett, A. H.; Edwards, M. D.; Kendrick, S. M.                                | 1999 | U.S. Pharmacist                                       | 24 |    | 38-43     |                                  | Study type |
| A multidisciplinary renal clinic for corticosteroid-induced bone disease                                                                                        | Neyhart, Clara D.; Dooley, Mary Anne; Joy, Melanie S.                                         | 2000 | Pharmacotherapy                                       | 20 | 2  | 206-216   | 10.1592/phco.20.3.206.34787      | Study type |
| Osteoporosis: Point-of-Care Testing                                                                                                                             | Gonzalez, English H.; DeHart, Renee M.                                                        | 2004 | Annals of Pharmacotherapy                             | 38 | 3  | 473-481   | 10.1345/aph.1D229                | Study type |
| Women's Perception of Bone-Mineral Density Testing and Osteoporosis Education in the Community Pharmacy                                                         | Lai, Lydia K.; Armstrong, Edward P.; French, Rachel; Skrepnek, Grant H.; Salcido, Amista Lone | 2003 | Consultant Pharmacist                                 | 18 | 11 | 968-976   |                                  | Study type |
| An opportunity for medication risk reduction, healthcare provider collaboration, and improved patient care: A retrospective analysis of osteoporosis management | Bernett, Gary B.; Feldman, S. Stephen; Martin, Harlan; Smith, Bruce C.; Raineri, Brian D.     | 2003 | Journal of the American Medical Directors Association | 4  | 6  | 329-336   | 10.1016/S1525-8610(04)70393-X    | Study type |
| Pharmacist-run teriparatide clinic                                                                                                                              | Stroup, J.; Kane, M. P.; Busch, R. S.                                                         | 2003 | American Journal of Health-System Pharmacy            | 60 | 1  | 2247-2249 |                                  | Study type |
| Improved bone health behavior using community pharmacists as educators: the Geisinger Health System Community Pharmacist Osteoporosis Education Program         | Newman, E. D.; Hanus, P.                                                                      | 2001 | Disease Management & Health Outcomes                  | 9  |    | 329-335   | 10.2165/00115677-200109060-00004 | Study type |
| Vitamin D deficiency in aged-care facilities: Prescribing support through residential medication management reviews                                             | Gebauer, M.                                                                                   | 2007 | Journal of Pharmacy Practice and Research             | 37 | 3  | 194-196   |                                  | Study type |
| Multifaceted educational program increases prescribing of preventive medication for corticosteroid induced osteoporosis                                         | Naunton, M.; Peterson, G. M.; Jones, G.; Griffin, G. M.; Bleasel, M. D.                       | 2004 | The Journal of Rheumatology                           | 31 | 3  | 550-6     |                                  | Study type |



|                                                                                                                                       |                                                                                                                                                                                                                                                                                   |      |                                                 |     |   |         |                                  |            |
|---------------------------------------------------------------------------------------------------------------------------------------|-----------------------------------------------------------------------------------------------------------------------------------------------------------------------------------------------------------------------------------------------------------------------------------|------|-------------------------------------------------|-----|---|---------|----------------------------------|------------|
| Evaluation of calcium and vitamin D supplementation in bisphosphonate therapy                                                         | Rush, Dawn N.; Jones, Martha W.; Futrell, Debra P.; Futrell, William R.; McDowell, Joseph O.; Ferreri, Stefanie P.                                                                                                                                                                | 2007 | Journal of the American Pharmacists Association | 47  | 6 | 725-728 | 10.1331/JAPhA.2007.06072         | Study type |
| Community pharmacy-based implementation and evaluation of an Osteoporosis Self-Assessment Tool for Asians                             | Laowakul, Ampuscha; Karnchanarat, Saree; Pikulthong, Nisakorn; Ongphiphadhanakul, Boonsong; Chaiyakunapruk, Nathorn                                                                                                                                                               | 2006 | Journal of the American Pharmacists Association | 46  | 3 | 391-396 | 10.1331/154434506777069624       | Study type |
| Sustainability of a pharmacist-driven pathway for osteoporosis-related fractures on an orthopaedic unit after a 5-year period         | Pink, Jennifer; Thomas, Lesley; Lai, Beryl; Gibb, Catherine                                                                                                                                                                                                                       | 2012 | International Journal of Pharmacy Practice      | 20  | 2 | 134-137 | 10.1111/j.2042-7174.2011.00167.x | Study type |
| Regional osteoporosis screening, referral, and monitoring program in community pharmacies: Findings from project ImPACT: Osteoporosis | Goode, J. V.; Swiger, K.; Bluml, B. M.                                                                                                                                                                                                                                            | 2004 | Journal of the American Pharmacists Association | 44  | 2 | 152-160 |                                  | Study type |
| Measuring the impact of pharmacist intervention: Results of patient education about osteoporosis after fragility fracture             | Ho, Clarene; Campbell, Anna; Cranney, Ann                                                                                                                                                                                                                                         | 2006 | Canadian Journal of Hospital Pharmacy           | 59  | 4 | 184-193 |                                  | Study type |
| Impact and feasibility of a community pharmacy bone mineral density screening and education program                                   | Cerulli, J.; Zeolla, M. M.                                                                                                                                                                                                                                                        | 2004 | Journal of the American Pharmacists Association | 44  | 2 | 161-167 |                                  | Study type |
| Integrating a brief pharmacist intervention into practice: Osteoporosis pharmacotherapy assessment                                    | Phillips, L.; Ferguson, R.; Diduck, K.; Lamb, D.; Jorgenson, D.                                                                                                                                                                                                                   | 2012 | Canadian Pharmacists Journal                    | 145 | 5 | 218-220 |                                  | Study type |
| Impact of a pharmacist-directed intervention in postmenopausal women after fracture                                                   | Heilmann, Rachel M. F.; Friesleben, Cari R.; Billups, Sarah J.                                                                                                                                                                                                                    | 2012 | American Journal of Health-System Pharmacy      | 69  | 6 | 504-509 | 10.2146/ajhp110309               | Study type |
| Pharmacy-based bone mass measurement to assess osteoporosis risk                                                                      | Elliott, Mary E.; Meek, Patrick D.; Kanous, Nathan L.; Schill, Gary R.; Weinswig, Patricia A.; Bohlman, John P.; Zimpel, Casey L.; Jensen, Brian C.; Walters, Dan R.; Sutter, Sue L.; Peterson, Andy N.; Peterson, Rhonda M.; Binkley, Neil C.; Morand, Brenda R.; Mallet, Louise | 2002 | Annals of Pharmacotherapy                       | 36  | 4 | 571-577 | 10.1345/aph.1A299                | Study type |

|                                                                                                                                                       |                                                                                                                                                                                                                                                |      |                                                    |    |    |           |                                  |            |
|-------------------------------------------------------------------------------------------------------------------------------------------------------|------------------------------------------------------------------------------------------------------------------------------------------------------------------------------------------------------------------------------------------------|------|----------------------------------------------------|----|----|-----------|----------------------------------|------------|
| Impact of pharmacist-provided osteoporosis education and screening in the workplace                                                                   | Singla, Dana; Raney, Erin; Peters, Sondra                                                                                                                                                                                                      | 2006 | Journal of the American Pharmacists Association    | 46 | 2  | 216-218   | 10.1016/S1544-3191(15)31564-8    | Study type |
| Impact of a community pharmacist-directed clinic in improving screening and awareness of osteoporosis                                                 | Shapiro, Karen; Law, Anandi V.                                                                                                                                                                                                                 | 2005 | Journal of Evaluation in Clinical Practice         | 11 | 3  | 247-255   | 10.1111/j.1365-2753.2005.00531.x | Study type |
| Osteoporosis screening by community pharmacists: use of National Osteoporosis Foundation resources                                                    | Elliott, Mary E.; Meek, Patrick D.; Kanous, Nathan L.; Schill, Gary R.; Weinswig, Patricia A.; Bohlman, John P.; Zimpel, Casey L.; Jensen, Brian C.; Walters, Dan R.; Sutter, Sue L.; Peterson, Andy N.; Peterson, Rhonda M.; Binkley, Neil C. | 2002 | Journal of the American Pharmaceutical Association | 42 | 1  | 101-111   | 10.1331/108658002763538134       | Study type |
| Two-year changes in bone mineral density and T scores in patients treated at a pharmacist-run teriparatide clinic                                     | Stroup, J. S.; Rivers, S. M.; Abu-Baker, A. M.; Kane, M. P.                                                                                                                                                                                    | 2007 | Pharmacotherapy                                    | 27 | 6  | 779-788   |                                  | Study type |
| Evaluation of compliance with osteoporosis treatment guidelines after initiation of a pharmacist-run osteoporosis service at a family medicine clinic | Hall, L. N.; Shrader, S. P.; Ragucci, K. R.; Hall, Larissa N.; Shrader, Sarah P.; Ragucci, Kelly R.                                                                                                                                            | 2009 | Annals of Pharmacotherapy                          | 43 | 11 | 1781-1786 | 10.1345/aph.1M366                | Study type |
| Modifying calcium and vitamin D supplementation intake in women at risk of Osteoporosis                                                               | Navarete, Jacquelyn Padilla; Machado, Matthew; Mistry, Ameer                                                                                                                                                                                   | 2012 | U.S. Pharmacist                                    | 37 | 9  | 37-43     |                                  | Study type |
| Osteoporosis screening and education in community pharmacies using a team approach                                                                    | Snella, Kathleen A.; Raehl, Cynthia R.; Winston, Thomas S.; MacLaughlin, Anitra A.; Fike, David S.; MacLaughlin, Eric J.                                                                                                                       | 2005 | Pharmacotherapy                                    | 25 | 3  | 379-386   | 10.1592/phco.25.3.379.61604      | Study type |
| Organization and results of student pharmacist bone mineral density screenings in women                                                               | Harris, A. C.; Doucette, W. R.; Reist, J. C.; Nelson, K. E.                                                                                                                                                                                    | 2011 | Journal of the American Pharmacists Association    | 51 | 1  | 100-104   | 10.1331/JAPhA.2011.09062         | Study type |
| Integration of pharmacists into a patient-centered medical home                                                                                       | Scott, M. A.; Hitch, B.; Ray, L.; Colvin, G.                                                                                                                                                                                                   | 2011 | Journal of the American Pharmaceutical Association | 51 |    | 161-166   | 10.1131/JAPHA.2011.10185         | Study type |
| How can osteoporosis patients benefit more from their therapy? Adherence issues with bisphosphonate therapy                                           | Gold, D. T.; Alexander, I. M.; Ettinger, M. P.                                                                                                                                                                                                 | 2006 | Annals of Pharmacotherapy                          | 40 |    | 1143-1150 | 10.1345/aph.1G534                | Study type |
| Medication interventions for fall prevention in the older adult                                                                                       | Cooper, J. W.; Burfield, A. H.                                                                                                                                                                                                                 | 2009 | Journal of the American Pharmacists Association    | 49 | 3  | e70-e84   | 10.1131/JAPHA.2009.09044         | Study type |

|                                                                                                                                                              |                                                                                                                                                                                                                                                              |      |                                                       |    |    |         |                                  |            |
|--------------------------------------------------------------------------------------------------------------------------------------------------------------|--------------------------------------------------------------------------------------------------------------------------------------------------------------------------------------------------------------------------------------------------------------|------|-------------------------------------------------------|----|----|---------|----------------------------------|------------|
| The impact of pharmacist intervention on the use of activated vitamin D in a tertiary referral hospital in Malaysia                                          | Siow, J. Y.; Lai, P. S.; Chua, S. S.; Chan, S. P.                                                                                                                                                                                                            | 2009 | International Journal of Pharmacy Practice            | 17 |    | 305-311 | 10.121/ijpp/17.05.0008           | Study type |
| PRO-OSTEO Project (improving osteoporosis management in the acute hospital setting): a pilot single-centre study                                             | Banakh, I.                                                                                                                                                                                                                                                   | 2011 | Archives of Osteoporosis                              | 6  |    | 157-65  | 10.1007/s11657-011-0061-0        | Study type |
| Osteoporosis is underdiagnosed in skilled nursing facilities: a large-scale heel BMD screening study                                                         | Gloth, F. M., 3rd; Simonson, W.                                                                                                                                                                                                                              | 2008 | Journal of the American Medical Directors Association | 9  | 3  | 190-3   | 10.1016/j.jamda.2007.12.003      | Study type |
| Clinical pharmacists boost success of osteoporosis outreach effort                                                                                           | Olegario, Robert; Park, Julie; Kjell, Janice                                                                                                                                                                                                                 | 2008 | Drug Benefit Trends                                   | 20 | 10 | 391-400 |                                  | Study type |
| Medication review with a focus on fracture prophylaxis among patients suffering collum femoris fractures                                                     | Munk, Christina Lyster; Bendixen, Henriette Kunoy; Kjeldsen, Lene Juel                                                                                                                                                                                       | 2011 | European journal of Hospital Pharmacy Practice        | 17 | 2  | 26-30   |                                  | Study type |
| Improving drug adherence in osteoporosis: an update on more recent studies                                                                                   | Jaleel, Ayesha; Saag, Kenneth G.; Danila, Maria I.                                                                                                                                                                                                           | 2018 | Therapeutic Advances in Musculoskeletal Disease       | 10 | 7  | 141-149 | 10.1177/1759720X18785539         | Study type |
| Randomized controlled trials covering pharmaceutical care and medicines management: A systematic review of literature                                        | Babar, Z. U.; Kousar, R.; Murtaza, G.; Azhar, S.; Khan, S. A.; Curley, L.                                                                                                                                                                                    | 2018 | Research in social & administrative pharmacy          | 14 | 6  | 521-539 | 10.1016/j.sapharm.2017.06.008    | Study type |
| Analytical quality and effectiveness of point-of-care testing in community pharmacies: A systematic literature review                                        | Buss, Vera H.; Deeks, Louise S.; Shield, Alison; Kosari, Sam; Naunton, Mark                                                                                                                                                                                  | 2019 | Research in social & administrative pharmacy          | 15 | 5  | 483-495 | 10.1016/j.sapharm.2018.07.013    | Study type |
| Analysis of quality improvement efforts in preventing glucocorticoid-induced osteoporosis                                                                    | Tory, H. O.; Solomon, D. H.; Desai, S. P.                                                                                                                                                                                                                    | 2015 | Seminars in Arthritis and Rheumatism                  | 44 | 5  | 483-488 | 10.1016/j.semarthrit.2014.09.011 | Study type |
| Prevention and management of osteoporotic fractures by non-physician health professionals: a systematic literature review to inform EULAR points to consider | Wilson, N.; Hurkmans, E.; Adams, J.; Bakkens, M.; Balazova, P.; Baxter, M.; Blavnsfeldt, A. B.; Briot, K.; Chiari, C.; Cooper, C.; Dragoi, R.; Gabler, G.; Lems, W.; Mosor, E.; Pais, S.; Simon, C.; Studenic, P.; Tilley, S.; de la Torre, J.; Stamm, T. A. | 2020 | RMD Open                                              | 6  |    | e001143 | 10.1136/rmdopen-2019-001143      | Study type |
| Prevention of falls in the elderly: a review                                                                                                                 | Karlsson, Magnus K.; Vonschewelov, Thord; Karlsson, Caroline; Coster, Maria; Rosengen, Bjorn E.                                                                                                                                                              | 2013 | Scandinavian journal of public health                 | 41 | 5  | 442-454 | 10.1177/1403494813483215         | Study type |

|                                                                                                                                                                                       |                                                                                 |      |                                                             |                 |    |     |                   |                           |                                 |
|---------------------------------------------------------------------------------------------------------------------------------------------------------------------------------------|---------------------------------------------------------------------------------|------|-------------------------------------------------------------|-----------------|----|-----|-------------------|---------------------------|---------------------------------|
| The impact of pharmacist interventions on osteoporosis management: A systematic review                                                                                                | Elias, M. N.; Burden, A. M.; Cadarette, S. M.                                   | 2011 | Osteoporosis International                                  |                 | 22 | 10  | 2587-2596         | 10.1007/s00198-011-1661-7 | Study type                      |
| Effectiveness of interventions to improve the detection and treatment of osteoporosis in primary care settings: a systematic review and meta-analysis                                 | Laliberte, M. C.; Perreault, S.; Jouini, G.; Shea, B. J.; Lalonde, L.           | 2011 | Osteoporosis International                                  |                 | 22 | 11  | 2743-68           | 10.1007/s00198-011-1557-6 | Study type                      |
| Review of services provided by pharmacies that promote healthy living                                                                                                                 | Brown, D.; Portlock, J.; Rutter, P.; Brown, David; Portlock, Jane; Rutter, Paul | 2012 | International Journal of Clinical Pharmacy                  |                 | 34 | 3   | 399-409           | 10.1007/s11096-012-9634-2 | Study type                      |
| Collaborative physician/pharmacist osteoporosis clinic model                                                                                                                          | Scott, M. A.; Ray, L. L.                                                        | 2009 | ASHP Midyear Clinical Meeting                               |                 |    |     | 234               |                           | Non-full text original research |
| Outpatient Infusion Center Monitoring Guidelines for Intravenous Bisphosphonates A Community Hospitals Experience                                                                     | Shepherd, A.                                                                    | 2012 | ASHP Summer Meeting                                         |                 |    |     | 49-T              |                           | Non-full text original research |
| Prevention and Management of Osteoporosis                                                                                                                                             | Elliott, M. E.                                                                  | 2010 | The Journal of the Pharmacy Society of Wisconsin            | March/<br>April |    |     | 29-40             |                           | Non-full text original research |
| Impact of community osteoporosis screening by pharmacists on diagnostic testing and prescribing by primary care physicians                                                            | Faulkner, M. A.; Ryan-Haddad, A. M.; Coover, K.; Burns, T.; Lenz, T. L.         | 2005 | ASHP Midyear Clinical Meeting                               |                 | 40 |     | P552R             |                           | Non-full text original research |
| Bone mineral density testing: community pharmacists' role in education and osteoporosis risk assessment                                                                               | Tran, M. T.                                                                     | 1999 | ASHP Midyear Clinical Meeting                               |                 | 34 | Dec | P-250R            |                           | Non-full text original research |
| Impact of a university based pharmacist coordinated wellness center on the healthy people 2010 objectives                                                                             | Lassila, H. C.; O'Neil, C. K.; Berdine, H. J.; Livengood, B.; Skomo, M.         | 2008 | American Association of Colleges of Pharmacy Annual Meeting |                 | 72 | 3   | NIL_0105-NIL_0106 |                           | Non-full text original research |
| Measuring the potential contribution of community pharmacists in identifying, understanding and meeting the bone health needs of patients in collaboration with General Practitioners | Hollingshead, C.; Rajaei-Dehkordi, Z.; Gray, M.; Wysocki, R.; Ewan, M.          | 2002 | ASHP Midyear Clinical Meeting                               |                 | 37 | Dec | ASC-4             |                           | Non-full text original research |
| Evidence based assessment of pharmaceutical interventions for the treatment and prevention of osteoporosis (CPS-O-009)                                                                | Bell, J. S.; Chen, T. F.; McLachlan, A. J.                                      | 2002 | International Pharmaceutical Federation World Congress      |                 | 62 |     | 77                |                           | Non-full text original research |
| Evaluation of the use of calcium for the prevention or treatment of osteoporosis in postmenopausal women                                                                              | Sickels, J. M.                                                                  | 2000 | ASHP Midyear Clinical Meeting                               |                 | 35 | Dec | P-401R            |                           | Non-full text original research |

|                                                                                                                                                                                      |                                                                                                                                          |      |                                                             |           |        |           |                                 |                                    |
|--------------------------------------------------------------------------------------------------------------------------------------------------------------------------------------|------------------------------------------------------------------------------------------------------------------------------------------|------|-------------------------------------------------------------|-----------|--------|-----------|---------------------------------|------------------------------------|
| Succeeding in dynamic times: Providing pharmacist-conducted disease screening to frontier communities                                                                                | Stratton, T. P.; Williams, R. G.; Meine, K. L.; Bartels, C. L.                                                                           | 2003 | AACP Annual Meeting                                         | 104       | Jul    | NIL_0185  |                                 | Non-full text<br>original research |
| Community pharmacy osteoporosis database project with the peripheral instantaneous x-ray imager (PIXI)                                                                               | Elliott, M. E.; Binkley, N. C.; Meek, P. D.; Kanous, N. L.                                                                               | 1999 | American Association of Colleges of Pharmacy Annual Meeting | 100       | Jul    | 26        |                                 | Non-full text<br>original research |
| Role of the Pharmacist in Medication Therapy Management Services in Patients with Osteoporosis                                                                                       | Murphy-Menezes, Megan                                                                                                                    | 2015 | Clinical Therapeutics                                       | 37        | 7      | 1573-1586 | 10.1016/j.clinthera.2015.03.023 | Non-full text<br>original research |
| Use of medications affecting fracture risk in long-term care residents with multiple sclerosis                                                                                       | Faulkner, M. A.; Ryan-Haddad, A. M.; Lenz, T. L.; Stading, J. A.                                                                         | 2004 | ASHP Midyear Clinical Meeting                               | 39        | Dec    | P143E     |                                 | Non-full text<br>original research |
| Effects of pharmacist intervention on calcium and vitamin D supplementation in the prevention and treatment of osteoporosis                                                          | Lenzi, L.; Eldridge, S.; Steinkellner, A.                                                                                                | 2011 | ASHP Midyear Clinical Meeting                               | 2010      |        | MCS-10    |                                 | Non-full text<br>original research |
| A randomized controlled trial of a community pharmacist-initiated screening and intervention program for patients at high risk for osteoporosis - the OsteoPharm study               | Yuksel, N.; Majumdar; Biggs, C.; Tsuyuki, R. T.                                                                                          | 2008 | Canadian Pharmacists Journal                                | 141       | 6      | 323       |                                 | Non-full text<br>original research |
| Cultivating across "pockets of excellence": challenges to sustaining efforts to improve osteoporosis care                                                                            | Van Tiem, Jennifer M.; Wardyn, Shylo; Santana, Xiomara; Seaman, Aaron T.; Steffen, Melissa J. A.; Solimeo, Samantha L.; Miller, Karla L. | 2021 | Osteoporosis International                                  | Epub 2021 | Aug 19 |           | 10.1007/s00198-021-06098-9      | Non-full text<br>original research |
| Community osteoporosis screening services for the prevention of osteoporotic fractures in population health: a literature review                                                     | Nguyen, V. H.                                                                                                                            | 2017 | International Journal of Evidence-Based Healthcare          | 15        | 2      | 43-52     | 10.1097/xeb.0000000000000104    | Non-full text<br>original research |
| The management of osteoporosis following hip fracture: How to improve our care                                                                                                       | Fisher, Alexander A.; Davis, Michael W.; Budge, Marc M.                                                                                  | 2004 | Osteoporosis International                                  | 15        | 7      | 583-584   | 10.1007/s00198-004-1645-y       | Non-full text<br>original research |
| The effectiveness and cost-effectiveness of an integrated osteoporosis care programme for postmenopausal women in Flanders: study protocol of a quasi-experimental controlled design | Verdonck, C.; Annemans, L.; Goemaere, S.; Lapauw, B.; Goderis, G.; Balligand, E.; Doom, M. P.; Perkisas, S.; Borgermans, L.              | 2020 | Archives of Osteoporosis                                    | 15        | 1      | 107       | 10.1007/s11657-020-00776-7      | Non-full text<br>original research |
| Telephone motivational interviewing ineffective in treatment of osteoporosis                                                                                                         | Anonymous                                                                                                                                | 2012 | Australian Journal of Pharmacy                              | 93        | 1107   | 91        |                                 | Non-full text<br>original research |

|                                                                                                                                                                                                                                                  |                                                                                                                                                        |      |                                                       |     |      |         |                                 |                                     |
|--------------------------------------------------------------------------------------------------------------------------------------------------------------------------------------------------------------------------------------------------|--------------------------------------------------------------------------------------------------------------------------------------------------------|------|-------------------------------------------------------|-----|------|---------|---------------------------------|-------------------------------------|
| Study protocol for a single-centre, prospective, non-blinded, randomised, 12-month, parallel-group superiority study to compare the efficacy of pharmacist intervention versus usual care for elderly patients hospitalised in orthopaedic wards | Komagamine, Junpei; Sugawara, Kenichi; Kaminaga, Miho; Tatsumi, Shinpei                                                                                | 2018 | BMJ Open                                              | 8   | 7    | e021924 | 10.1136/bmjopen-2018-021924     | Non-full text original research     |
| A multidisciplinary approach to managing osteoporosis                                                                                                                                                                                            | Hale, L. S.; Goehring, M.                                                                                                                              | 2003 | Annals of Long-Term Care                              | 11  | 6    | 40-47   |                                 | Non-full text original research     |
| Developing a mobile pharmacist-conducted wellness clinic for rural Montana communities                                                                                                                                                           | Williams, Robert G.; Meine, Kari L.; Stratton, Timothy P.                                                                                              | 2005 | Journal of the American Pharmacists Association       | 45  | 3    | 390-399 | 10.1331/1544345054003723        | Non-full text original research     |
| How pharmacists can make a difference in managing osteoporosis and falls                                                                                                                                                                         | Kanji, Mohamed                                                                                                                                         | 2002 | Pharmaceutical Journal                                | 269 | 7219 | 534     |                                 | Non-full text original research     |
| Pharmacist-physician collaboration in an osteoporosis management service                                                                                                                                                                         | Burkiewicz, J. S.                                                                                                                                      | 2009 | ASHP Midyear Clinical Meeting                         |     |      | 234     |                                 | Non-full text original research     |
| Implementing a knowledge translation intervention in long-term care: feasibility results from the Vitamin D and Osteoporosis Study (ViDOS)                                                                                                       | Kennedy, C. C.; Thabane, L.; Ioannidis, G.; Adachi, J. D.; Papaioannou, A.                                                                             | 2014 | Journal of the American Medical Directors Association | 15  | 12   | 943-5   | 10.1016/j.jamda.2014.05.007     | Not involve pharmacist intervention |
| Effects of educational materials concerning osteoporosis on women's knowledge, beliefs, and behavior                                                                                                                                             | Blalock, S. J.; Currey, S. S.; DeVellis, R. F.; DeVellis, B. M.; Giorgino, K. B.; Anderson, J. J.; Dooley, M. A.; Gold, D. T.                          | 2000 | American Journal of Health Promotion                  | 14  | 3    | 161-9   | 10.4278/0890-1171-14.3.161      | Not involve pharmacist intervention |
| Improvements in osteoporosis testing and care are found following the wide scale implementation of the Ontario Fracture Clinic Screening Program: An interrupted time series analysis                                                            | Beaton, D. E.; Mamdani, M.; Zheng, H.; Jaglal, S.; Cadarette, S. M.; Bogoch, E. R.; Sale, J. E. M.; Sujic, R.; Jain, R.                                | 2017 | Medicine (Baltimore)                                  | 96  | 48   | e9012   | 10.1097/md.00000000000009012    | Not involve pharmacist intervention |
| Effects of an osteoporosis prevention program incorporating tailored educational materials                                                                                                                                                       | Blalock, S. J.; DeVellis, B. M.; Patterson, C. C.; Campbell, M. K.; Orenstein, D. R.; Dooley, M. A.                                                    | 2002 | American Journal of Health Promotion                  | 16  | 3    | 146-56  | 10.4278/0890-1171-16.3.146      | Not involve pharmacist intervention |
| Patient education in groups increases knowledge of osteoporosis and adherence to treatment: A two-year randomized controlled trial                                                                                                               | Knold, Berit; Nielsen, Winnie; Nielsen, Dorth; Ryg, Jesper; Nissen, Nis; Brixen, Kim                                                                   | 2010 | Patient Education and Counselling                     | 81  | 2    | 155-160 | 10.1016/j.pec.2010.03.010       | Not involve pharmacist intervention |
| Osteoporosis telephonic intervention to improve medication regimen adherence: a large, pragmatic, randomized controlled trial                                                                                                                    | Solomon, D. H.; Iversen, M. D.; Avorn, J.; Gleeson, T.; Brookhart, M. A.; Patrick, A. R.; Rekedal, L.; Shrank, W. H.; Lii, J.; Losina, E.; Katz, J. N. | 2012 | Archives of Internal Medicine                         | 172 | 6    | 477-83  | 10.1001/archinternmed.2011.1977 | Not involve pharmacist intervention |

|                                                                                                                               |                                                                                                                                                  |      |                                         |     |    |           |                           |                                           |
|-------------------------------------------------------------------------------------------------------------------------------|--------------------------------------------------------------------------------------------------------------------------------------------------|------|-----------------------------------------|-----|----|-----------|---------------------------|-------------------------------------------|
| A systematic review of interventions by healthcare professionals on community-dwelling postmenopausal women with osteoporosis | Lai, P.; Chua, S. S.;<br>Chan, S. P.                                                                                                             | 2010 | Osteoporosis<br>International           | 21  | 10 | 1637-56   | 10.1007/s00198-010-1199-0 | Not involve<br>pharmacist<br>intervention |
| Osteoporosis Improvement: A Large-Scale Randomized Controlled Trial of Patient and Primary Care Physician Education           | Solomon, D.H., Katz,<br>J.N., Finkelstein, J.S.,<br>Polinski, J.M., Stedman,<br>M., Brookhart, M.A.,<br>Arnold, M., Gauthier,<br>S.Z., Avorn, J. | 2007 | Journal of Bone and<br>Mineral Research | 22  | 11 | 1808-1815 | 1-.1359/JBMR.070717       | Not involve<br>pharmacist<br>intervention |
| Priming primary care physicians to treat osteoporosis after a fragility fracture: an integrated multidisciplinary approach    | Roux, S.; Beaulieu, M.;<br>Beaulieu, M. C.; Cabana,<br>F.; Boire, G.                                                                             | 2013 | The Journal of<br>Rheumatology          | 40  | 5  | 703-11    | 10.3899/jrheum.120908     | Role of pharmacist<br>not specified       |
| Pharmacists and nurses provide regional care to osteoporosis patient: Fee for infusion care                                   | Bos, Edwin                                                                                                                                       | 2016 | Pharmaceutisch<br>Weekblad              | 151 | 43 | 22        |                           | Non-English                               |
