# Supplementary material for: Pharmacist interventions in osteoporosis management: a systematic review
Source: PubMed Central journal article supplement — Osteoporos Int. 2022 Oct 14;34(2):239–54. doi: 10.1007/s00198-022-06561-1 (PMC9852145; doi:10.1007/s00198-022-06561-1), 2022-10-14
Supplement: 198_2022_6561_MOESM5_ESM.pdf [file 198_2022_6561_MOESM5_ESM.pdf]

**Article title**

Pharmacist interventions in osteoporosis management: a systematic review

**Journal name**

Osteoporosis International

**Author information**

Catherine Laird

ORCID 0000-0002-8550-2901

Corresponding author: [catherine.d.laird@student.uts.edu.au](mailto:catherine.d.laird@student.uts.edu.au)

Graduate School of Health, University of Technology Sydney, PO Box 123, NSW, 2007, Australia.

Helen Benson

ORCID 0000-0002-6918-5045

Kylie A Williams

ORCID 0000-0002-5094-243X

**Online Resource 5** Complete extracted study results

| Study                                            | Participant characteristics<br>(Sample size, age,<br>%female)                                                                                                                         | Outcomes Measured                                                                                                                                                                                                                                                                                          | Results                                                                                                                                                                                                                                                                                                                                               | Statistical Significance                                                                                                                                                                                                                                                                                                                                                                                                                          |
|--------------------------------------------------|---------------------------------------------------------------------------------------------------------------------------------------------------------------------------------------|------------------------------------------------------------------------------------------------------------------------------------------------------------------------------------------------------------------------------------------------------------------------------------------------------------|-------------------------------------------------------------------------------------------------------------------------------------------------------------------------------------------------------------------------------------------------------------------------------------------------------------------------------------------------------|---------------------------------------------------------------------------------------------------------------------------------------------------------------------------------------------------------------------------------------------------------------------------------------------------------------------------------------------------------------------------------------------------------------------------------------------------|
| <b>Studies targeting diagnosis and treatment</b> |                                                                                                                                                                                       |                                                                                                                                                                                                                                                                                                            |                                                                                                                                                                                                                                                                                                                                                       |                                                                                                                                                                                                                                                                                                                                                                                                                                                   |
| <i>Interventions: patients only</i>              |                                                                                                                                                                                       |                                                                                                                                                                                                                                                                                                            |                                                                                                                                                                                                                                                                                                                                                       |                                                                                                                                                                                                                                                                                                                                                                                                                                                   |
| McDonough et al. [24]                            | <u>Sample size</u><br>IG: 8 pharmacies<br>70 participants<br>CG: 7 pharmacies<br>26 participants<br><br><u>Age (years)</u><br>Not reported<br><br><u>% Female</u><br>IG: 74<br>CG: 58 | A) Central BMD via DEXA<br>B) Bisphosphonate therapy<br>C) Estrogen therapy<br>D) Calcium: supplement<br>E) Calcium: reported low diet intake<br>F) Awareness of need for bone density test<br>G) Discussion with pharmacist GIOP Risk undertaken<br>H) Discussion with pharmacist regarding need for DEXA | A) CG 39.2% vs IG 19.6% <sup>a</sup><br>B) CG 10.5% vs IG 9.1% <sup>a</sup><br>C) CG 0.0% vs IG 3.5% <sup>a</sup><br>D) CG -6.9% vs IG 17.1% <sup>a</sup><br>E) CG -15.0% vs IG -16.3% <sup>a</sup><br>F) CG 13.9% vs IG 19.3% <sup>a</sup><br>G) Stated as increase in both groups <sup>a</sup><br>H) Stated as increase in both groups <sup>a</sup> | A) Not statistically different: p-value not reported<br>B) Not statistically different: p-value not reported<br>C) Not statistically different: p-value not reported<br>D) Statistically different: p-value <0.05<br>E) Not statistically different: p-value not reported<br>F) Not statistically different: p-value not reported<br>G) Not statistically different: p-value not reported<br>H) Not statistically different: p-value not reported |
| Yuksel et al. [31]                               | <u>Sample size</u><br>15 pharmacies<br>IG: 129 participants                                                                                                                           | A) Follow-up with physician: osteoporosis specific appointment                                                                                                                                                                                                                                             | A) CG 22/133 (17%) vs IG 45/129 (35%)<br>B) CG 13/133 (10%) vs IG 28/129 (22%)<br>C) CG 3/133 (2%) vs IG 6/129 (5%)                                                                                                                                                                                                                                   | A) Statistically different: p-value <0.001<br>B) Statistically different (RR 2.2, 95% CI 1.2-4.1): p-value=0.011                                                                                                                                                                                                                                                                                                                                  |

|                       |                                                                                                                                                                                                                                                |                                                                                                                                                                                                             |                                                                                                                           |                                                                                                                                                                                                                                                                          |
|-----------------------|------------------------------------------------------------------------------------------------------------------------------------------------------------------------------------------------------------------------------------------------|-------------------------------------------------------------------------------------------------------------------------------------------------------------------------------------------------------------|---------------------------------------------------------------------------------------------------------------------------|--------------------------------------------------------------------------------------------------------------------------------------------------------------------------------------------------------------------------------------------------------------------------|
|                       | <p>CG: 133 participants</p> <p><u>Age (years)</u><br/>IG: median 61 (range 56-70)<br/>CG: median 62 (range 57-71)</p> <p><u>% Female</u><br/>IG: 62<br/>CG: 67</p>                                                                             | <p>B) Central BMD via DEXA<br/>C) Osteoporosis therapy<br/>D) Calcium: additional patients reaching RDI<br/>E) Vitamin D: additional patients reaching RDI<br/>F) Knowledge level: % answered correctly</p> | <p>D) CG 25/133 (19%) vs IG 39/129 (30%)<br/>E) CG 22/133 (17%) vs IG 24/129 (19%)<br/>F) CG 54% vs IG 57%</p>            | <p>C) Not Statistically different (RR 2.1, 95% CI 0.5-8.1): p-value=0.298<br/>D) Statistically different (RR 1.6, 95% CI 1.0-2.5): p-value=0.011<br/>E) Not statically different (RR 1.1, 95% CI 0.7-1.9) p-value=0.66<br/>F) Not statically different: p-value=0.31</p> |
| Brookhart et al. [29] | <p><u>Sample size</u><br/>IG: 58<br/>CG: 52</p> <p><u>Age (years)</u><br/>IG: 53±SD11<br/>CG: 53±SD13</p> <p><u>% Female</u><br/>100</p>                                                                                                       | <p>A) Knowledge level: overall score</p>                                                                                                                                                                    | <p>A) CG 44%<sup>b</sup> vs IG 77%<sup>b</sup></p>                                                                        | <p>A) Statistically different: p-value &lt;0.001</p>                                                                                                                                                                                                                     |
| Sabna et al. [33]     | <p><u>Sample size</u><br/>IG: 14<br/>CG: 15</p> <p><u>Age (years)</u><br/>IG: mean 34±SD8<br/>CG: mean 34±SD9</p> <p><u>% Female</u><br/>100</p>                                                                                               | <p>A) Central BMD via DEXA: change in spine T-score<br/>B) Central BMD via DEXA: change in Femoral Neck T-score</p>                                                                                         | <p>A) CG MD 0.08 ±SD 0.78 vs IG MD 0.44 ±SD 1.65<br/>B) CG MD 0.05 ±SD 0.02 vs IG MD 0.87 ±SD 0.07</p>                    | <p>A) Statistically different: p-value &lt;0.01<br/>B) Statistically different: p-value &lt;0.01</p>                                                                                                                                                                     |
| Crockett et al. [27]  | <p><u>Sample size</u><br/>IG: 6 pharmacies<br/>119 participants<br/>CG: 6 pharmacies<br/>98 participants</p> <p><u>Age (years)</u><br/>IG: mean 57 (range 36-78)<br/>CG: mean 58 (range 40-84)</p> <p><u>% Female</u><br/>IG:87<br/>CG: 83</p> | <p>A) Follow-up with physician<br/>B) Calcium: increase of intake<br/>C) Vitamin D: increase of intake</p>                                                                                                  | <p>A) CG 3/22 (13.6%) vs IG 2/7 (28.6%)<br/>B) CG 29/38 (76%) vs IG 37/45 (82%)<br/>C) CG 4/7 (57%) vs IG 18/21 (86%)</p> | <p>A) Not statistically different: p-value not reported<br/>B) Not statistically different: p-value not reported<br/>C) Not statistically different: p-value not reported</p>                                                                                            |

|                                                   |                                                                                                                                                                                                                                   |                                                                                                                                                                                 |                                                                                                                                                                                                                                                                                                                                                                                                                                                                                                                                                                                                                          |                                                                                                                                                                                                                                                                                                                                                                                                                                                                                                                                                                                                                                                                                                                                                                                                                                                                                                                                                                                                                                                                                                                                                                                                                                                                                                                                                                                                                                                                                                                      |
|---------------------------------------------------|-----------------------------------------------------------------------------------------------------------------------------------------------------------------------------------------------------------------------------------|---------------------------------------------------------------------------------------------------------------------------------------------------------------------------------|--------------------------------------------------------------------------------------------------------------------------------------------------------------------------------------------------------------------------------------------------------------------------------------------------------------------------------------------------------------------------------------------------------------------------------------------------------------------------------------------------------------------------------------------------------------------------------------------------------------------------|----------------------------------------------------------------------------------------------------------------------------------------------------------------------------------------------------------------------------------------------------------------------------------------------------------------------------------------------------------------------------------------------------------------------------------------------------------------------------------------------------------------------------------------------------------------------------------------------------------------------------------------------------------------------------------------------------------------------------------------------------------------------------------------------------------------------------------------------------------------------------------------------------------------------------------------------------------------------------------------------------------------------------------------------------------------------------------------------------------------------------------------------------------------------------------------------------------------------------------------------------------------------------------------------------------------------------------------------------------------------------------------------------------------------------------------------------------------------------------------------------------------------|
| <p>McConaha et al. [28]</p>                       | <p><u>Sample size</u><br/>IG: 44<br/>CG: 43</p> <p><u>Age (years)</u><br/>IG: mean 57 (range 44-65)<br/>CG: mean 57 (range 47-65)</p> <p><u>% Female</u><br/>100</p>                                                              | <p>A) Follow-up with physician<br/>B) Central BMD via DEXA<br/>C) Osteoporosis therapy<br/>D) Calcium: diet intake increased<br/>E) Vitamin D: started/increased supplement</p> | <p>A) CG 20/33 (60.6%) vs IG 20/39 (51.3%)<br/>B) CG 14/33 (42.4%) vs IG 14/39 (35.9%)<br/>C) CG 0/33 (0%) vs IG 4/39 (10.2%)<br/>D) CG 24/33 (72.7%) vs IG 28/39 (71.8%)<br/>E) CG 30/33 (90.9%) vs IG 27/39 (69.2%)</p>                                                                                                                                                                                                                                                                                                                                                                                                | <p>A) Not statically different: p-value=0.428<br/>B) Not statically different: p-value = 0.571<br/>C) Not statically different: p-value = 0.058<br/>D) Not statistically different: p-value = 0.930<br/>E) Statically different: p-value 0.024</p>                                                                                                                                                                                                                                                                                                                                                                                                                                                                                                                                                                                                                                                                                                                                                                                                                                                                                                                                                                                                                                                                                                                                                                                                                                                                   |
| <p><i>Interventions: involving physicians</i></p> |                                                                                                                                                                                                                                   |                                                                                                                                                                                 |                                                                                                                                                                                                                                                                                                                                                                                                                                                                                                                                                                                                                          |                                                                                                                                                                                                                                                                                                                                                                                                                                                                                                                                                                                                                                                                                                                                                                                                                                                                                                                                                                                                                                                                                                                                                                                                                                                                                                                                                                                                                                                                                                                      |
| <p>Solomon et al. [23]</p>                        | <p><u>Sample size</u><br/>IG: 222 physicians<br/>997 participants<br/>CG: 212 physicians<br/>976 participants</p> <p><u>Age (years)</u><br/>IG: mean 68±SD9<br/>CG: mean 69 ±SD8</p> <p><u>% Female</u><br/>IG: 90<br/>CG: 94</p> | <p>A) Central BMD via DEXA<br/>B) Osteoporosis therapy</p>                                                                                                                      | <p>Overall<br/>A) CG 86/976 (9%) vs IG 126/997 (13%)<br/>B) CG 36/976 (4%) vs IG 59/997 (6%)</p> <p>≥65-year women<br/>A) CG 81/861 (9%) vs IG 115/819 (14%)<br/>B) CG 35/861 (4%) vs IG 54/819 (7%)</p> <p>Men or women with fracture<br/>A) CG 4/95 (4%) vs IG 11/134 (8%)<br/>B) CG 1/95 (1%) vs IG 6/134 (4%)</p> <p>Men or women using glucocorticoids<br/>A) CG 19/199 (10%) vs IG 23/237 (10%)<br/>B) CG 15/199 (8%) vs IG 14/237 (6%)</p> <p>C) Adherence: median Medication Possession Ratio (MPR)<sup>f</sup><br/>C) CG 73% (IQR 0-93%) vs IG 74% (IQR 19-93%)<br/>D) CG 79 (IQR 31-158) vs IG 85 (58-174)</p> | <p>Overall<br/>A) Statistically different: (Unadjusted RR 1.43, 95% CI 1.06-1.94, Adjusted RR 1.48 95% CI 1.08-2.04) Unadjusted p-value=0.02, Adjusted p-value 0.01<br/>B) Statistically different (Unadjusted RR 1.60, 95% CI 1.04-2.49, Adjusted RR 1.73, 95% CI 1.09-2.75) Unadjusted P-value= 0.03, Adjusted p-value=0.02</p> <p>≥65-year women<br/>A) Statistically different (Unadjusted RR 1.49, 95% CI 1.09-2.04, Adjusted RR 1.48, 95% CI 1.07-2.04) Unadjusted p-value=0.02, Adjusted p-value 0.02<br/>B) Statistically different (Unadjusted RR 1.67, 95% CI 1.05-2.65, Adjusted RR 1.65, 95% CI 1.04-2.62) Unadjusted p-value=0.03, Adjusted p-value=0.03</p> <p>Men or women with fracture<br/>A) Statistically different (adjusted) (Unadjusted RR 1.95, 95% CI 0.64-6.00, Adjusted RR 2.86, 95% CI 1.15-7.07) Unadjusted p-value=0.20, Adjusted p-value=0.02<br/>B) Not statistically different (Unadjusted RR 4.41, 95% CI 0.52-37, Adjusted RR 10.67, 95% CI 0.81-141) Unadjusted p-value=0.20, Adjusted p-value=0.07</p> <p>Men or women using glucocorticoids<br/>A) Not statistically different (Unadjusted RR 1.02, 95% CI 0.57-1.82, Adjusted RR 1.05, 95% CI 0.57-1.93) Unadjusted p-value=0.9, Adjusted p-value=0.9<br/>B) Not statistically different (Unadjusted RR 0.77, 95% CI 0.38-1.58, Adjusted RR 0.92, 95% CI 0.45-1.87) Unadjusted p-value=0.5, Adjusted p-value= 0.8</p> <p>C) Not statically different: p-value = 0.18<br/>D) Not statically different: p-value not reported</p> |

|                                                   |                                                                                                                                                                                                                          |                                                                                                                      |                                                                                                                                                                                                                  |                                                                                                                                                                                                                                                                                                                                                                                                                      |
|---------------------------------------------------|--------------------------------------------------------------------------------------------------------------------------------------------------------------------------------------------------------------------------|----------------------------------------------------------------------------------------------------------------------|------------------------------------------------------------------------------------------------------------------------------------------------------------------------------------------------------------------|----------------------------------------------------------------------------------------------------------------------------------------------------------------------------------------------------------------------------------------------------------------------------------------------------------------------------------------------------------------------------------------------------------------------|
|                                                   |                                                                                                                                                                                                                          | D) Adherence: median days until medication discontinuation <sup>c</sup>                                              |                                                                                                                                                                                                                  |                                                                                                                                                                                                                                                                                                                                                                                                                      |
| Tso et al. [30]                                   | <u>Sample size</u><br>IG (1): 2197<br>IG (2): 2197<br>CG: 2197<br><br><u>Age (years)</u><br>IG (1): mean 80 (range 66-104)<br>IG (2): mean 80 (range 66-105)<br>CG: mean 80 (range 66-105)<br><br><u>% Female</u><br>100 | A) Central BMD via DEXA<br>B) Osteoporosis therapy                                                                   | Intent to treat: 4 months from intervention<br>A) CG 117/2,197 (5.3%) vs IG (1) 124/2,197 (5.6%) vs IG(2) 179/2,197 (8.1%)<br>B) CG 116/21,197 (5.3%) vs IG(1) 126/2,197 (5.7%) vs IG(2) 153/2,197 (7.0%)        | Intent to treat: 4 months from intervention<br>A) Statistically different: CG vs IG(2) p-value<0.001; Statistically different IG(1) vs IG(2) p-value=0.001; Not statistically different CG vs IG(1) p-value not reported.<br>B) Statistically different CG vs IG(2) p-value=0.019; Not statistically different IG(1) vs IG(2) p-value=0.095; Not statistically different CG vs IG(1) p-value not reported            |
|                                                   |                                                                                                                                                                                                                          |                                                                                                                      | Intent to treat: 6 months from fracture index date<br>A) CG 187/2,197 (8.5%) vs IG (1) 175/2,197 (8.0%) vs IG(2) 238/2,197 (10.8%)<br>B) CG 127/2,197 (5.8%) vs IG(1) 128/2,197 (5.8%) vs IG(2) 150/2,197 (6.8%) | Intent to treat: 6 months from fracture index date<br>A) Statistically different: CG vs IG(2) p-value=0.009; Statistically different IG(1) vs IG(2) p-value=0.001; Not statistically different CG vs IG(1) p-value not reported<br>B) Not statistically different: CG vs IG(2) p-value=0.153; Not statistically different IG(1) vs IG(2) p-value=0.173; Not statistically different CG vs IG(1) p-value not reported |
|                                                   |                                                                                                                                                                                                                          |                                                                                                                      | Per protocol: 4 months from intervention<br>A) CG 112/1,833 (6.1%) vs IG(1) 36/498 (7.2%) vs IG(2) 126/1,369 (9.2%)<br>B) CG 107/1,833 (5.8%) vs IG(1) 26/498 (5.2%) vs IG(2) 113/1,369 (8.3%)                   | Per protocol: 4 months from intervention<br>A) Statistically different: CG vs IG(2) p-value=0.001; Comparison with IG(1) not possible due to failing to meet sample size<br>B) Statistically different: CG vs IG(2) p-value<0.008; Comparison with IG(1) not possible due to failing to meet sample size                                                                                                             |
|                                                   |                                                                                                                                                                                                                          |                                                                                                                      | Per protocol: 6 months from fracture index date<br>A) CG 171/1,833 (9.3%) vs IG(1) 41/498 (8.2%) vs IG(2) 156/1,369 (11.4%)<br>B) CG 115/1,833 (6.3%) vs IG(1) 25/498 (5.0%) vs IG(2) 102/1,369 (7.5%)           | Per protocol: 6 months from the fracture index date<br>A) Not statistically different: CG vs IG(2) p-value=0.148; Comparison with IG(1) not possible due to failing to meet sample size<br>B) Not statistically different: CG vs IG(2) p-value=0.059; Comparison with IG(1) not possible due to failing to meet sample size                                                                                          |
| Klop et al. [32]                                  | <u>Sample size</u><br>IG: 343<br>CG: 352<br><br><u>Age (years)</u><br>IG: 66±SD17<br>CG: 69±SD15<br><br><u>% Female</u><br>IG:55<br>CG:55                                                                                | A) Osteoporosis therapy: % commenced therapy<br>B) Calcium: % commenced therapy<br>C) Vitamin D: % commenced therapy | A) CG 8.0% vs IG 11.4%<br>B) CG 2.6% vs IG 5.3 %<br>C) CG 1.7% vs IG 3.5%                                                                                                                                        | A) Not statistically different (Unadjusted HR 1.47, CI 0.91-2.39; Adjusted HR 1.54, CI 0.95-2.50)<br>B) Not statistically different (Unadjusted HR 2.06, CI 0.93-4.59; Adjusted HR 2.12, CI 0.95-4.72)<br>C) Not statistically different (Unadjusted HR 2.05, CI 0.77-5.47; Adjusted HR 2.08, CI 0.78-5.55)                                                                                                          |
|                                                   |                                                                                                                                                                                                                          |                                                                                                                      | Men<br>A) CG 5.1% vs IG 12.8%                                                                                                                                                                                    | Men<br>A) Statistically different (Unadjusted HR 2.53, CI 1.11-5.74; Adjusted HR 2.55, CI 1.12-5.80)                                                                                                                                                                                                                                                                                                                 |
|                                                   |                                                                                                                                                                                                                          |                                                                                                                      | ≥ 70 years<br>A) CG 4.9% vs IG 13.4%                                                                                                                                                                             | ≥ 70 years<br>A) Statistically different (Unadjusted HR 2.88, CI 1.33-6.23; Adjusted HR 2.99, CI 1.38-6.47)                                                                                                                                                                                                                                                                                                          |
| <i>Interventions: multidisciplinary care team</i> |                                                                                                                                                                                                                          |                                                                                                                      |                                                                                                                                                                                                                  |                                                                                                                                                                                                                                                                                                                                                                                                                      |
|                                                   | <u>Sample size</u>                                                                                                                                                                                                       |                                                                                                                      | Intent to treat                                                                                                                                                                                                  | Intent to treat                                                                                                                                                                                                                                                                                                                                                                                                      |

|                                    |                                                                                                                                                                                                                                  |                                                                                                                                                            |                                                                                                                                                                                                                                                                                                                                                                                                                                                |                                                                                                                                                                                                                                                                                                                                                                                                                                                                                                                                                                                                                                                                              |
|------------------------------------|----------------------------------------------------------------------------------------------------------------------------------------------------------------------------------------------------------------------------------|------------------------------------------------------------------------------------------------------------------------------------------------------------|------------------------------------------------------------------------------------------------------------------------------------------------------------------------------------------------------------------------------------------------------------------------------------------------------------------------------------------------------------------------------------------------------------------------------------------------|------------------------------------------------------------------------------------------------------------------------------------------------------------------------------------------------------------------------------------------------------------------------------------------------------------------------------------------------------------------------------------------------------------------------------------------------------------------------------------------------------------------------------------------------------------------------------------------------------------------------------------------------------------------------------|
| Kennedy et al. [25]                | <p>IG: 19 facilities<br/>2185 participants<br/>CG: 21 facilities<br/>3293 participants</p> <p><u>Age (years)</u><br/>IG: mean 84±SD11<br/>CG: mean 85±SD11</p> <p><u>% Female</u><br/>IG: 70<br/>CG: 71</p>                      | <p>A) Osteoporosis therapy: change in prescribing<br/>B) Calcium: supplement: change in prescribing<br/>C) Vitamin D: supplement change in prescribing</p> | <p>A) Between group difference 3.4% (95% CI 2.6-4.2%)<br/>B) Between group difference 7.0% (95% CI 6.2-7.9%)<br/>C) Between group difference 14.7% (95% CI 13.1-16.2%)</p> <p>Per Protocol<br/>A) Between group difference 2.9% (95% CI 1.7-4.1%)<br/>B) Between group difference 13.1% (95% CI 12.0-14.2%)<br/>C) Between group difference 27.0% (95% CI 25.5-28.5%)</p>                                                                      | <p>A) Not statically different (Unadjusted OR 1.17, 95% CI 0.91-1.51; Adjusted OR 1.12, 95% CI 0.87-1.44)<br/>B) Statistically different (Unadjusted OR 1.33, 95% CI 1.01-1.74, Adjusted OR 1.33, 1.01-1.77)<br/>C) Statistically different (Unadjusted OR 1.82, 95% CI 1.12-2.96, Adjusted OR 1.85, 95% CI 1.13-3.06)</p> <p>Per protocol<br/>A) Not statically different (Unadjusted OR 1.20 95% CI 0.90-1.60, Adjusted OR 1.16, 95% CI 0.87-1.53)<br/>B) Statistically different (Unadjusted OR 1.57, 95% CI 1.12-2.21, Adjusted OR 1.58, 95% CI 1.11-2.24)<br/>C) Statistically different (Unadjusted OR 3.06, 95% CI 2.18-4.29, Adjusted OR 3.14, 95% CI 2.22-4.45)</p> |
| <b>Studies targeting adherence</b> |                                                                                                                                                                                                                                  |                                                                                                                                                            |                                                                                                                                                                                                                                                                                                                                                                                                                                                |                                                                                                                                                                                                                                                                                                                                                                                                                                                                                                                                                                                                                                                                              |
| Kooij et al. [26]                  | <p><u>Sample size</u><br/>IG: 25 pharmacies<br/>319 participants<br/>CG: 28 pharmacies<br/>252 participants</p> <p><u>Age (years)</u><br/>IG: mean 66±SD14<br/>CG: mean 67±SD13</p> <p><u>% Female</u><br/>IG: 79<br/>CG: 74</p> | <p>A) Adherence: mean MPR as continuous outcome<br/>B) Adherence: refill rate ≥80%</p>                                                                     | <p>Intent to treat<br/>A) CG 73.3 (SD 38.1) vs IG 75.2 (SD 38.4)<br/>B) CG 169/252 (67.1%) vs IG 224/319 (70.2%)</p> <p>Per protocol<br/>A) CG 73.3 (SD 38.1) vs IG 84.3 (SD 31.7)<br/>B) CG 169/252 (67.1%) vs IG 112/137 (81.8%)</p>                                                                                                                                                                                                         | <p>Intent to treat<br/>A) Not statistically different (RD -0.54, 95% CI -9.43-6.14)<br/>B) Not statistically different (OR 1.0, 95% CI 0.57-1.49)</p> <p>Per protocol<br/>A) Statistically different (RD 10.2, 95% CI 1.98-16.4) B) Statistically different (OR 2.15, 95% CI 1.32-3.57)</p>                                                                                                                                                                                                                                                                                                                                                                                  |
| Lai et al. [34]                    | <p><u>Sample size</u><br/>IG: 100<br/>CG: 98</p> <p><u>Age (years)</u><br/>IG: mean 65 ±SD9<br/>CG: mean 67 ±SD10</p> <p><u>% Female</u><br/>100</p>                                                                             | <p>A) Adherence: direct report<br/>B) Adherence: pill count<br/>C) Adherence: self-record<br/>D) Knowledge level: median score<sup>d</sup></p>             | <p>3 months<br/>A) CG mean 94.96 ±SD 7.01 vs IG mean 93.21 ±SD 10.26<br/>B) CG mean 97.30 ±SD 5.35 vs IG mean 96.57 ±SD 7.23<br/>C) 97.38 ±SD 5.33 vs Intervention mean 96.85 ±SD 6.52<br/>D) CG 62.50% vs IG 72.50%</p> <p>6 months<br/>A) CG mean 93.98 ±SD 9.92 vs IG mean 93.24 ±SD 9.17<br/>B) CG mean 97.01 ±SD 7.22 vs IG mean 98.83 ±SD 3.02<br/>C) CG mean 96.79 ±SD 7.97 vs IG mean 98.91 ±SD 3.23<br/>D) CG 65.00% vs IG 75.00%</p> | <p>3 months<br/>A) Not statistically different: p-value = 0.369<br/>B) Not Statistically different: p-value = 0.547<br/>C) Not statistically different: p-value=0.495<br/>D) Statistically different: p-value &lt;0.001</p> <p>6 months<br/>A) Not statistically different: p-value = 0.343<br/>B) Statistically different: p-value = 0.028<br/>C) Statistically different: p-value=0.015<br/>D) Statistically different: p-value &lt;0.001</p>                                                                                                                                                                                                                              |

|  |  |  |                                                                                                                                                                                                                   |                                                                                                                                                                                                            |
|--|--|--|-------------------------------------------------------------------------------------------------------------------------------------------------------------------------------------------------------------------|------------------------------------------------------------------------------------------------------------------------------------------------------------------------------------------------------------|
|  |  |  | 12 months<br>A) CG mean 94.27 ±SD 12.27 ± vs IG mean 94.73 ± SD 6.56<br>B) CG mean 96.46 ±SD 10.17 vs IG mean 97.70 ±SD 4.68<br>C) CG mean 96.17 ±SD 10.95 vs IG mean 97.97 ±SD 5.25<br>D) CG 68.75% vs IG 78.75% | 12 months<br>A) Not statistically different: p-value = 0.216<br>B) Not statistically different: p-value= 0.322<br>C) Statistically different: p-value= 0.047<br>D) Statistically different: p-value <0.001 |
|--|--|--|-------------------------------------------------------------------------------------------------------------------------------------------------------------------------------------------------------------------|------------------------------------------------------------------------------------------------------------------------------------------------------------------------------------------------------------|

<sup>a</sup>% change from baseline, <sup>b</sup> Approximate % scores calculated from the graph (no tabulated results), <sup>c</sup> secondary analysis reported by Shu et al (2009) [20], <sup>d</sup> secondary outcome reported by Lai et al 2013 [19]

CG- Comparator Group; IG- Intervention Group; CI- Confidence Interval; HR-Hazard Ratio; IQR- Interquartile range; MD- Mean Deviation; OR- Odds ratio; RR-relative risk; RD-Risk difference; SD-Standard Deviation
