# Supplementary material for: Pharmacist interventions in osteoporosis management: a systematic review
Source: PubMed Central journal article supplement — Osteoporos Int. 2022 Oct 14;34(2):239–54. doi: 10.1007/s00198-022-06561-1 (PMC9852145; doi:10.1007/s00198-022-06561-1), 2022-10-14
Supplement: 198_2022_6561_MOESM6_ESM.pdf [file 198_2022_6561_MOESM6_ESM.pdf]

**Article title**

Pharmacist interventions in osteoporosis management: a systematic review

**Journal name**

Osteoporosis International

**Author information**

Catherine Laird

ORCID 0000-0002-8550-2901

Corresponding author: [catherine.d.laird@student.uts.edu.au](mailto:catherine.d.laird@student.uts.edu.au)

Graduate School of Health, University of Technology Sydney, PO Box 123, NSW, 2007, Australia.

Helen Benson

ORCID 0000-0002-6918-5045

Kylie A Williams

ORCID 0000-0002-5094-243X

**Online Resource 6** Quality appraisal

Table 1 Sources utilised for risk of bias and quality appraisal

| <b>Study</b>                 | <b>Sources utilised</b>                                             |
|------------------------------|---------------------------------------------------------------------|
| McDonough et al. (2005) [24] | Study report [24]                                                   |
| Yuksel et al. (2010) [31]    | Study reports [21,31]<br>Published protocol [37]                    |
| Brookhart et al. (2015) [29] | Study report [29]                                                   |
| Sabna et al. (2018) [33]     | Study report [33]<br>Trial registry [41]                            |
| Crockett et al. (2008) [27]  | Study report [27]                                                   |
| McConaha et al. (2014) [28]  | Study report [28]<br>Trial registry [38]                            |
| Solomon et al. (2007) [23]   | Study reports [20,23]                                               |
| Tso et al. (2015) [30]       | Study report [30]                                                   |
| Klop et al. (2014) [32]      | Study report [32]                                                   |
| Kennedy et al. (2015) [25]   | Study report [25]<br>Published protocol [35]<br>Trial registry [40] |
| Kooij et al. (2016) [26]     | Study report [26]<br>Published protocol [36]<br>Trial registry [39] |
| Lai et al. (2011) [34]       | Study reports [18,19,34]                                            |

Table 2 CASP Checklist Results

|                                                                                                                                     | McDonough [24] | Solomon [23] | Crockett [27] | YukseI [31] | Lai [34] | McConaha [28] | Klop [32] | Kennedy [25] | Brookhart [29] | Tso [30] | Kooij [26] | Sabna [33] |
|-------------------------------------------------------------------------------------------------------------------------------------|----------------|--------------|---------------|-------------|----------|---------------|-----------|--------------|----------------|----------|------------|------------|
| Did the study address a clearly focused issue?                                                                                      | Y              | Y            | Y             | Y           | Y        | Y             | Y         | Y            | Y              | Y        | Y          | Y          |
| Was the assignment of participants to treatments randomised?                                                                        | Y              | Y            | Y             | Y           | Y        | Y             | Y         | Y            | Y              | Y        | Y          | Y          |
| Were all the participants who entered the trial properly accounted for?                                                             | Y              | Y            | Y             | Y           | Y        | Y             | Y         | Y            | Y              | Y        | Y          | Y          |
| Were participants 'blind' to intervention therapy were given?                                                                       | N              | ?            | N             | N           | N        | Y             | ?         | N            | N              | N        | N          | N          |
| Were investigators 'blind' to the intervention they were giving to participants?                                                    | N              | N            | N             | N           | N        | N             | N         | N            | N              | N        | N          | N          |
| Were the people assessing/ analysing outcome/s blinded?                                                                             | ?              | N            | N             | N           | N        | N             | N         | Y            | N              | N        | N          | N          |
| Were the study groups similar at the start of the randomised controlled trial?                                                      | N              | N            | Y             | N           | Y        | Y             | N         | N            | Y              | Y        | N          | Y          |
| Apart from the experimental intervention, did each study group receive the same level of care (that is, were they treated equally)? | Y              | Y            | Y             | Y           | Y        | Y             | Y         | Y            | Y              | Y        | Y          | Y          |
| Were the effects of intervention reported comprehensively?                                                                          | Y              | Y            | ?             | Y           | Y        | Y             | Y         | Y            | N              | Y        | Y          | Y          |
| Was the precision of the estimate of intervention or treatment effect reported?                                                     | Y              | Y            | Y             | Y           | Y        | Y             | Y         | Y            | Y              | Y        | Y          | Y          |
| Do the benefits of the experimental intervention outweigh the harms and costs?                                                      | ?              | ?            | ?             | ?           | ?        | ?             | ?         | ?            | ?              | ?        | Y          | ?          |
| Can the results be applied to your local population/in your context?                                                                | Y              | Y            | Y             | Y           | Y        | Y             | Y         | Y            | Y              | Y        | Y          | Y          |
| Would the experimental intervention provide greater value to the people in your care than any of the existing interventions?        | ?              | Y            | ?             | ?           | ?        | ?             | ?         | Y            | ?              | Y        | Y          | Y          |

Y- Yes; N-No; ?-Can't Tell
